# Supplementary material for: Dramatic effect of modified boranes in diastereoselective reduction of chiral cyclic α-ketophosphinates
Source: Royal Society of Chemistry journal article supplement (doi:10.1039/c2ra00799a), 2011-12-16
Supplement: c2ra00799a.pdf [file c2ra00799a.pdf]

## Supporting Information

### Dramatic effect of modified boranes in diastereoselective reduction of chiral cyclic $\alpha$ -ketophosphinates

Damien Filippini,<sup>1</sup> Severine Loiseau,<sup>1</sup> Norbert Bakalara,<sup>2</sup> Zosia Anna Dziuganowska,<sup>1,3</sup> Arie Van der Lee,<sup>4</sup> Jean-Noël Volle,<sup>1</sup> David Virieux\*<sup>1</sup> and Jean-Luc Pirat\*<sup>1</sup>

<sup>1</sup> AM2N, UMR 5253, ICGM, ENSCM, 8, rue de l'école normale, 34296 Montpellier cedex 5, France.

<sup>2</sup> INSERM U-1051, Hôpital Saint Eloi, rue Augustin Fliche, BP 74103, 34091 Montpellier Cedex 5, France.

<sup>3</sup> Department of Bioorganic Chemistry, Faculty of Chemistry, Wrocław University of Technology, Wrocław, Poland.

<sup>4</sup> Institut Européen des membranes, cc047 Université de Montpellier 2, 34095, Montpellier, France.

[Jean-luc.pirat@enscm.fr](mailto:Jean-luc.pirat@enscm.fr); [david.virieux@enscm.fr](mailto:david.virieux@enscm.fr)

### Table of contents

|                                                                                                                   |    |
|-------------------------------------------------------------------------------------------------------------------|----|
| <b>I. General considerations</b> .....                                                                            | 2  |
| <b>II. General procedure for the synthesis of 3 and 4</b> .....                                                   | 2  |
| <sup>31</sup> P NMR spectrum of a mixture of 3 and 4.....                                                         | 3  |
| Preparative HPLC analysis of a mixture of compounds 3 and 4.....                                                  | 4  |
| NMR <sup>31</sup> P, <sup>1</sup> H, <sup>13</sup> C, HPLC preparative, X-ray and mass spectra of compound 3..... | 6  |
| NMR <sup>31</sup> P, <sup>1</sup> H, <sup>13</sup> C, HPLC preparative and mass spectra of compound 4.....        | 13 |
| <b>III. Preparation of compound 7</b> .....                                                                       | 19 |
| NMR <sup>31</sup> P, <sup>1</sup> H, <sup>13</sup> C, HPLC preparative and mass spectra of compound 7.....        | 19 |
| <b>IV. Diastereoselective reduction of the <math>\alpha</math>-ketophosphinate 7</b> .....                        | 23 |
| Entry 1. NaBH <sub>4</sub> .....                                                                                  | 23 |
| Entry 2. NaBH <sub>4</sub> / (S,S)-tartaric acid.....                                                             | 24 |
| Entry 3. NaBH <sub>4</sub> / (R,R)-tartaric acid.....                                                             | 25 |
| Entry 4. NaBH <sub>4</sub> / CeCl <sub>3</sub> 7 H <sub>2</sub> O.....                                            | 26 |
| Entry 5. NaBH <sub>4</sub> / L-proline.....                                                                       | 29 |
| Entry 6. NaBH <sub>4</sub> / D-proline.....                                                                       | 30 |
| Entry 7. NaBH <sub>4</sub> / L-proline MgBr <sub>2</sub> .....                                                    | 31 |
| Entry 8. NaBH <sub>4</sub> / L-proline LiClO <sub>4</sub> .....                                                   | 34 |
| Entry 9 NaBH <sub>4</sub> / L-proline ZnCl <sub>2</sub> .....                                                     | 37 |
| Entry 10. NaBH <sub>4</sub> / L-proline CeCl <sub>3</sub> 7 H <sub>2</sub> O.....                                 | 40 |
| Entry 11. NaBH <sub>4</sub> / D-proline CeCl <sub>3</sub> 7 H <sub>2</sub> O.....                                 | 43 |

## I. General Considerations

Melting points were measured on a Büchi B-540 apparatus and are uncorrected. All new compounds were characterized by  $^1\text{H}$  NMR,  $^{13}\text{C}$  NMR and  $^{31}\text{P}$  NMR using a Bruker DRX 400 MHz NMR spectrometer or a Bruker Avance 250 MHz NMR spectrometer. All NMR experiments performed on phosphorus are indicated uncoupling of hydrogen and all studies led during processing were done with a DMSO- $\text{D}_6$  probe. High resolution mass spectra were measured on JEOL JMS-SX 102A spectrometer. Analytical HPLC (Column: Waters SunFire<sup>TM</sup> C18 5 $\mu$  4.6X250mm, Eluent: Acetonitrile/water (63:34), Flow: 1 mL.min<sup>-1</sup>)

**Materials:** Before use, commercial reagents were purified by distillation or sublimation. 2,3,5-tri-*O*-benzyl-*D*-arabinofuranose was purchased from Carbosynth and dried under vacuum before use. All manipulations were carried out using standard Schlenk Techniques. Solvents were dried according to current methods, distilled and stored under nitrogen atmosphere. All reactions involving air or moisture sensitive reagents or intermediates were carried out under dry nitrogen in flame-dried glassware.

## II. General procedure for the synthesis of **3** and **4**

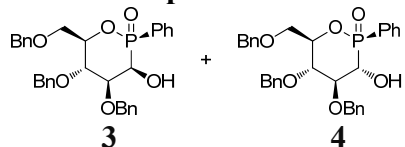

**4,5-bis-benzyloxy-6-benzyloxymethyl-2-phenyl-2-oxo-2 $\lambda^5$ -[1,2]oxaphosphinan-3-ol (**3**) and (**4**).** Ethyl phenylphosphinate (**1**) was prepared by a known literature method (esterification of commercial phenylphosphinic acid).<sup>1</sup> 2,3,5-tri-*O*-benzyl-*D*-arabinofuranose **2** (21.00 g, 49 mmol) was added under nitrogen to a solution of ethyl phenylphosphinate (**1**, 8.50 g, 50 mmol) in THF (70 mL). Freshly sublimated potassium *tert*-butoxide (1.12 g 12 mmol) was added to the solution. Reaction mixture was stirred at room temperature for 15 h. After solvent evaporation under vacuum, chloroform (160 mL) was added to the crude oil. The organic solution was washed with a saturated solution of ammonium chloride (3  $\times$  50 mL). The organic layer was dried over sodium sulfate, filtered off and solvent was evaporated under vacuum. The yellow oil residue containing a mixture of four diastereomers (25.7 g, 26/28/19/27) was dissolved in diethyl ether and a white precipitate was formed and filtered to give a mixture of **3/4** (6.35g, 48/52) as a white powder. After purification on Water Prep LC (Column: Waters SunFire<sup>TM</sup> C18, 8 $\mu\text{m}$ , 50 $\times$ 250 mm; Eluent: Acetonitrile/water (60:40); Flow: 17 mL.min<sup>-1</sup>), compounds **3** and **4** were recovered pure, respectively.

The two diastereomers (**3** and **4**), after separation were fully characterized allowing the attribution of the complete stereochemistry of all the stereogenic centers. Compounds **3** and **4** are respectively epimer at the carbon center.

<sup>1</sup> K. Afarinkia, H.-W. Yu, Hewitt reaction revisited, *Tetrahedron Letters*, **2003**, 44 (4), 781-783.

$^{31}\text{P}$  NMR spectrum of a mixture of **3** and **4**.

SL003 1

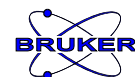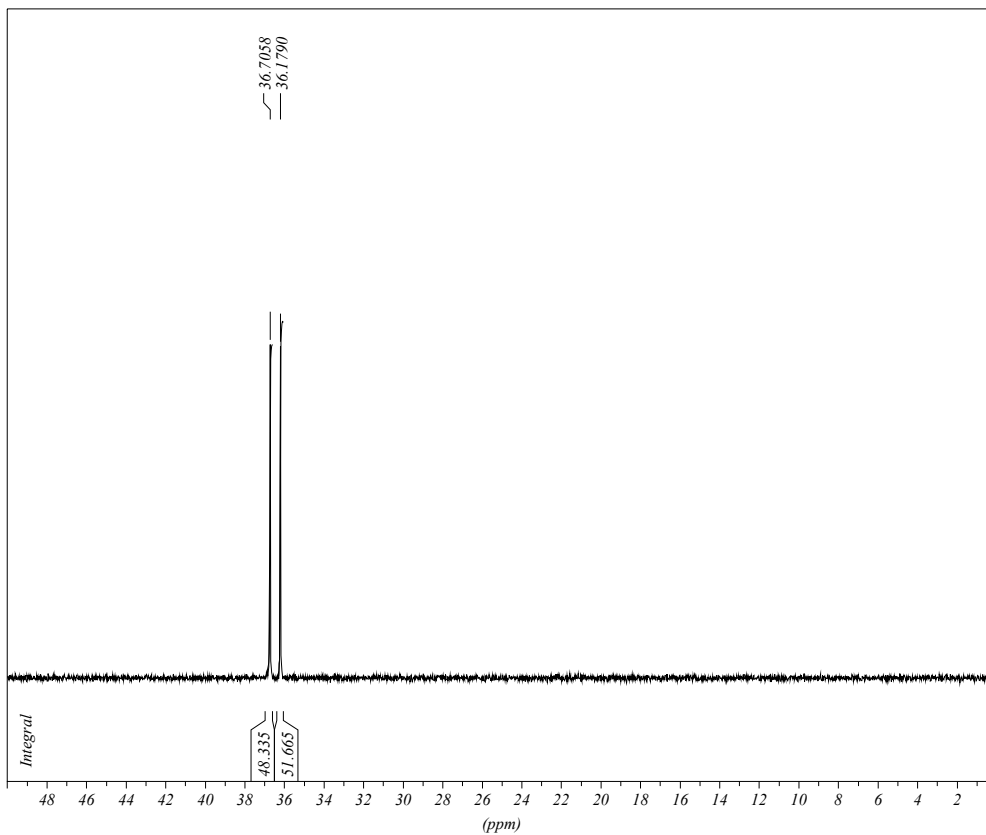

\*\*\* Current Data Parameters \*\*\*

NAME : 1  
EXPNO : 301  
PROCNO : 0

\*\*\* Acquisition Parameters \*\*\*

DATE\_t : 06:03:06  
DATE\_d : Mar 15 2010  
DE : 10.0 usec  
DS : 4  
NS : 16  
NUC1 :  $^{31}\text{P}$   
O1 : -5062.76 Hz  
O2 : 1000.52 Hz  
PROBHD : 5 mm QNP 1H/13C/31P/19F Z-GRD Z  
RG : 11585.2001953  
SFO1 : 101.2494172 MHz  
SW : 401.4878 ppm  
SW\_h : 40650.407 Hz  
TD : 65536

\*\*\* Processing Parameters \*\*\*

GB : 0.0000000  
LB : 1.00 Hz  
PC : 1.40  
SF : 101.2544800 MHz

\*\*\* 1D NMR Plot Parameters \*\*\*

Start : 50.01 ppm  
Stop : 0.01 ppm  
SR : 0.00 Hz  
ppm\_cm : 2.37  
Hz\_cm : 239.94



## Preparative HPLC analysis of a mixture of compounds **3** and

| SAMPLE INFORMATION |              |                     |                          |
|--------------------|--------------|---------------------|--------------------------|
| Sample Name:       |              | Acquired By:        | System                   |
| Sample Type:       | Unknown      | Date Acquired:      | 21/05/2010 14:33:52 CEST |
| Vial:              | 1            | Acq. Method Set:    | Iso60_flow17_18052010    |
| Injection #:       | 2            | Date Processed:     | 04/02/2011 10:27:20 CET  |
| Injection Volume:  | 1000,00 ul   | Processing Method:  | severine01_18052010      |
| Run Time:          | 40,0 Minutes | Channel Name:       | W2489 ChB                |
| Sample Set Name:   |              | Proc. Chnl. Descr.: | W2489 ChB 254nm          |

SampleName DEE055(mel)2\_flow17iso60\_2152010

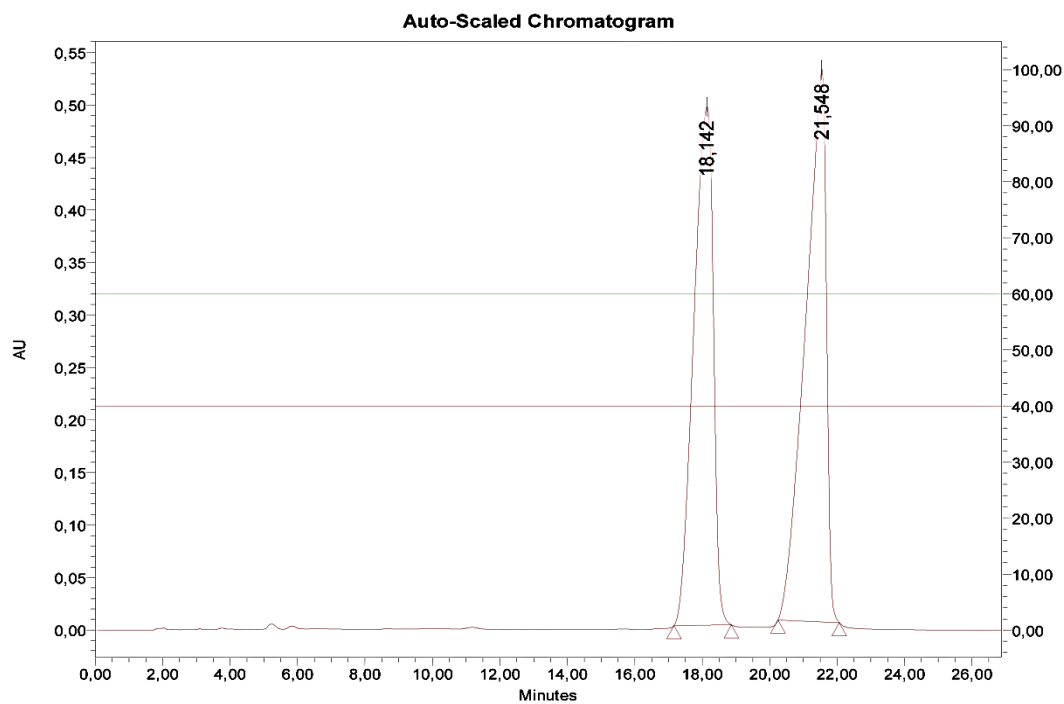

**Processed Channel: W2489 ChB 254nm**

|   | Processed Channel | Retention Time (min) | Area     | % Area | Height |
|---|-------------------|----------------------|----------|--------|--------|
| 1 | W2489 ChB 254nm   | 18,142               | 19900822 | 46,96  | 493963 |
| 2 | W2489 ChB 254nm   | 21,548               | 22481146 | 53,04  | 526147 |

SampleName  
DEE055(mel)2\_flow17iso60\_2152010

### SAMPLE INFORMATION

|                   |              |                     |                          |
|-------------------|--------------|---------------------|--------------------------|
| Sample Name:      |              | Acquired By:        | System                   |
| Sample Type:      | Unknown      | Date Acquired:      | 21/05/2010 14:33:52 CEST |
| Vial:             | 1            | Acq. Method Set:    | iso60_flow17_18052010    |
| Injection #:      | 2            | Date Processed:     | 21/05/2010 15:50:15 CEST |
| Injection Volume: | 1000,00 ul   | Processing Method:  | severine01_18052010      |
| Run Time:         | 40,0 Minutes | Channel Name:       | W2489 ChA                |
| Sample Set Name:  |              | Proc. Chnl. Descr.: | W2489 ChA 214nm          |

SampleName DEE055(mel)2\_flow17iso60\_2152010

### Auto-Scaled Chromatogram

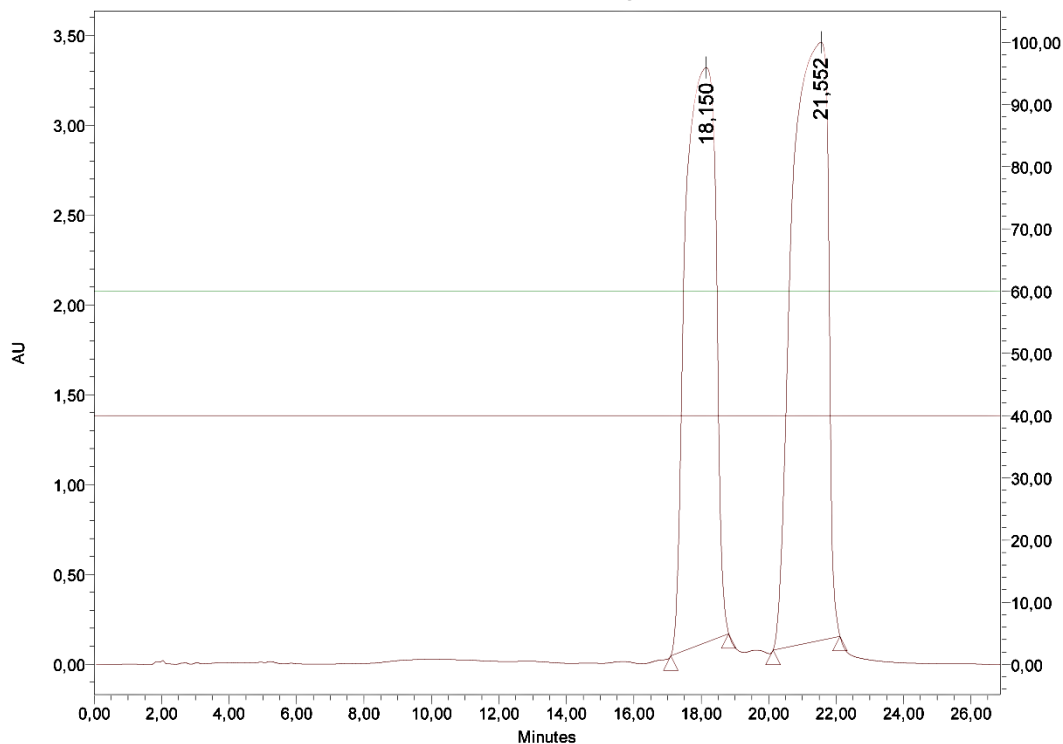

### Processed Channel: W2489 ChA 214nm

|   | Processed Channel | Retention Time (min) | Area      | % Area | Height  |
|---|-------------------|----------------------|-----------|--------|---------|
| 1 | W2489 ChA 214nm   | 18,150               | 198498074 | 44,84  | 3197363 |
| 2 | W2489 ChA 214nm   | 21,552               | 244200199 | 55,16  | 3327480 |

(2*S*,3*R*,4*S*,5*S*,6*R*)-4,5-bis-benzyloxy-6-benzyloxymethyl-2-phenyl-2-oxo-2λ<sup>5</sup>-[1,2]oxaphosphinan-3-ol **3**:

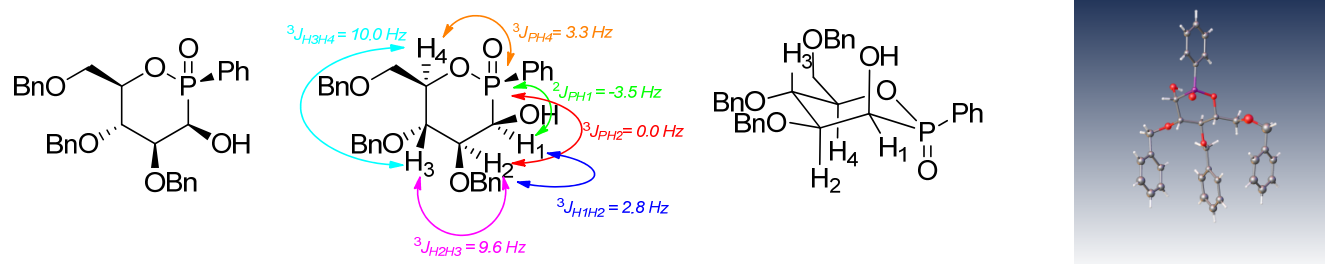

ORTEP structure of compound **3**.

White powder

<sup>31</sup>P NMR (161.97 MHz, CDCl<sub>3</sub>): δ (ppm) = 36.55 (s); <sup>1</sup>H NMR (400.13 MHz, CDCl<sub>3</sub>): δ (ppm) = 2.67 (s, 1H, OH), 3.80 (dd, <sup>2</sup>J<sub>HH</sub> = -11.3 Hz, <sup>3</sup>J<sub>HH</sub> = 2.0 Hz, 1H, OCH<sub>2</sub>), 4.00 (ddd, <sup>2</sup>J<sub>HH</sub> = 11.3 Hz, <sup>4</sup>J<sub>PH</sub> = 3.3 Hz, <sup>3</sup>J<sub>HH</sub> = 3.2 Hz, 1H, CH<sub>2</sub>), 4.30 (dd, <sup>3</sup>J<sub>HH</sub> = 10.0 Hz, <sup>3</sup>J<sub>HH</sub> = 9.6 Hz, 1H, PCCC<sub>H</sub>), 4.36 (dd, <sup>3</sup>J<sub>HH</sub> = 9.6 Hz, <sup>3</sup>J<sub>HH</sub> = 2.8 Hz, 1H, PCC<sub>H</sub>), 4.43 (dd, <sup>2</sup>J<sub>HP</sub> = -3.5 Hz, <sup>3</sup>J<sub>HH</sub> = 2.8 Hz, 1H, PCH), 4.56 (dddd, <sup>3</sup>J<sub>HH</sub> = 10.0 Hz, <sup>3</sup>J<sub>HH</sub> = 3.3 Hz, <sup>3</sup>J<sub>HP</sub> = 3.2 Hz, <sup>3</sup>J<sub>HH</sub> = 2.0 Hz, 1H, POCH), 7.24-7.38 (m, 15H, CH<sub>Ar</sub>), 7.48-7.54 (m, 2H, CH<sub>Ar</sub>), 7.62-7.68 (m, 1H, CH<sub>Ar</sub>), 7.96-8.03 (m, 2H, CH<sub>Ar</sub>); <sup>13</sup>C NMR (400.13 MHz, CDCl<sub>3</sub>): δ (ppm) = 66.81 (d, <sup>1</sup>J<sub>CP</sub> = 105.1 Hz, PCH), 68.91 (d, <sup>3</sup>J<sub>CP</sub> = 8.8 Hz, OCC<sub>H</sub>), 72.48 (s, PhCH<sub>2</sub>), 73.43 (s, PhCH<sub>2</sub>), 73.74 (d, <sup>1</sup>J<sub>CP</sub> = 2.2 Hz, CH), 75.46 (d, <sup>1</sup>J<sub>CP</sub> = 5.6 Hz, CH), 75.64 (s, PhCH<sub>2</sub>), 81.38 (d, <sup>2</sup>J<sub>CP</sub> = 2.9 Hz, PCC<sub>H</sub>), 126.53 (d, <sup>1</sup>J<sub>CP</sub> = 138.8 Hz, PC<sub>Ph</sub>), 127.68, 127.80, 127.84, 127.98, 128.19 (s, CH<sub>Bn</sub>), 128.31 (d, <sup>3</sup>J<sub>CP</sub> = 13.4 Hz, CH<sub>Ph</sub>), 128.42, 128.66 (s, CH<sub>Bn</sub>), 132.99 (d, <sup>2</sup>J<sub>CP</sub> = 9.9 Hz, CH<sub>Ph</sub>), 133.34 (d, <sup>4</sup>J<sub>CP</sub> = 2.8 Hz, CH<sub>Ph</sub>), 137.32, 138.07, 138.09 (s, C<sub>Bn</sub>); HRMS m/z (MH<sup>+</sup>) 545.2092 (calcd for C<sub>32</sub>H<sub>34</sub>O<sub>6</sub>P: 545.2093); Analytical HPLC (Column: Waters SunFire™ C18, 5 μm 4.6×250 mm; Eluent: acetonitrile/water (63:37), Flow: 1 mL.min<sup>-1</sup>): Retention time = 15.97.  $[\alpha]_D^{25} = +13.48$  (c 0.0445, CHCl<sub>3</sub>). HRMS m/z (MH<sup>+</sup>) 545.2091 (calcd for C<sub>32</sub>H<sub>34</sub>O<sub>6</sub>P: 545.2093); Analytical HPLC (Column: Waters SunFire™ C18, 5 μm 4.6×250 mm; Eluent: acetonitrile/water (63:37); Flow: 1 mL.min<sup>-1</sup>): Retention time = 15.97.

Suitable crystals for X-ray analysis were obtained in Et<sub>2</sub>O/CH<sub>2</sub>Cl<sub>2</sub> for compound **3** (CCDC 848920). According to the ORTEP structure, we were able to assign the absolute configuration of the newly created asymmetric centers of the diastereomer **3**. Compound **3** shows a chair structure with P<sub>2</sub>(*S*) and C<sub>3</sub>(*R*) configuration [Crystal data for compound **3**: Formula=C<sub>32</sub>H<sub>33</sub>O<sub>6</sub>P, *T* = 175 K, *M<sub>r</sub>* = 544.55 g mol<sup>-1</sup>, crystal size = 0.100×0.500×0.500 mm<sup>3</sup>, monoclinic, space group *P*21, *a* = 15.6590(3), *b* = 5.6930(1), *c* = 15.8108(3) Å, α = 90°, β = 91.3777(16)°, γ = 90°, *V* = 1409.07(5) Å<sup>3</sup>, *Z* = 2, ρ<sub>calcd</sub> = 1.283 g cm<sup>-3</sup>, μ = 1.221 mm<sup>-1</sup>, θ<sub>max</sub> = 66.187°, 13913 reflections measured, 4543 unique, 4074 with *I* > 2σ(*I*), *R*<sub>int</sub> = 0.031, <σ(*I*)/*I*> = 0.0384, refined parameters = 353, *R*<sub>1</sub> (*I* > 2σ(*I*)) = 0.0388, *wR*<sub>2</sub> (*I* > 2σ(*I*)) = 0.1001 *R*<sub>1</sub> (all data) = 0.0436, *wR*<sub>2</sub> (all data) = 0.1049, GOF = 0.9297, Δρ(min/max) = -0.26/0.25 eÅ<sup>-3</sup>. Cu radiation was used in order to have a more reliable estimate of the Flack and Hooft parameters. Charge flipping as implemented in *Superflip* (Palatinus, L.; Chapuis, G. J. Appl. Cryst. 2007, 40, 786-790) was used to solve the structure and least-squares from *CRYSTALS* (Betteridge, P. W.; Carruthers, J. R.; Cooper, R. I.; Prout, K.; Watkin, D. J. J. Appl. Crystallogr., 2003, 36, 1487) to refine the structure. The Flack parameter was refined to 0.07(2) and the Hooft parameter determined to be 0.08(1). The chance that the correct hand was assigned in the two-hypotheses model of an enantiopure material is 100%. (R. W. W. Hooft, L. H. Straver, A. L. Spek, J. Appl. Cryst. 41 2008, 96-103)].

The oxidation of the two diastereomers **3** and **4**, with Dess-Martin reagent afforded the same stereoisomer of α-ketophosphate **7**, demonstrating that compounds **3** and **4** are epimers at the carbon atom, α to the phosphorus atom. Furthermore, the vicinal coupling constant <sup>1</sup>H NMR data showed: a trans di-axial vicinal coupling constants between protons H<sub>2</sub>/H<sub>3</sub> (*J*<sub>H<sub>2</sub>-H<sub>3</sub></sub> = 9.6 Hz) and protons H<sub>3</sub>/H<sub>4</sub> (*J*<sub>H<sub>3</sub>-H<sub>4</sub></sub> = 10.0 Hz) and a cis axial-equatorial vicinal coupling constant between protons H<sub>1</sub>/H<sub>2</sub> (*J*<sub>H<sub>1</sub>-H<sub>2</sub></sub> = 2.8 Hz) confirming that in solution the major conformer is similar to those observed by X-ray.

### <sup>31</sup>P NMR – CDCl<sub>3</sub>

DF080P31CPD CDCl<sub>3</sub> opt/topspin am2n1 55

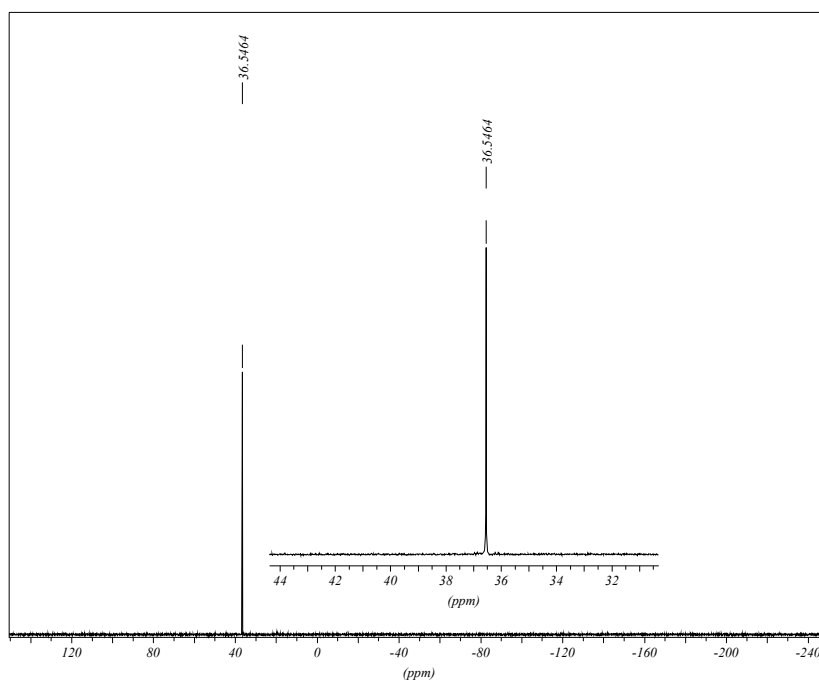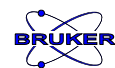

\*\*\* Current Data Parameters \*\*\*  
 NAME : 2010-0-1  
 EXPNO : 311  
 PROCNO : 0  
 \*\*\* Acquisition Parameters \*\*\*  
 DATE\_1 : 06:30:03  
 DATE\_d : May 10 2010  
 DE : 8.0 usec  
 DS : 4  
 NS : 32  
 NUC1 : 31P  
 O1 : -8078.82 Hz  
 O2 : 1600.52 Hz  
 PROBHD : 5 mm PAQNP Switch-1H Z-GRD Z84  
 RG : 20642.500000  
 SFO1 : 161.9674942 MHz  
 SW : 400.9142 ppm  
 SW\_h : 64935.065 Hz  
 TD : 65536  
 \*\*\* Processing Parameters \*\*\*  
 GB : 0.0000000  
 LB : 1.00 Hz  
 PC : 1.40  
 SF : 161.9755730 MHz  
 \*\*\* 1D NMR Plot Parameters \*\*\*  
 Start : 150.57 ppm  
 Stop : -250.32 ppm  
 SR : 0.01 Hz  
 ppm\_cm : 19.00  
 Hz\_cm : 3077.49

### <sup>1</sup>H NMR – CDCl<sub>3</sub>

DF080-cPROTON CDCl<sub>3</sub> opt/topspin cristau 9

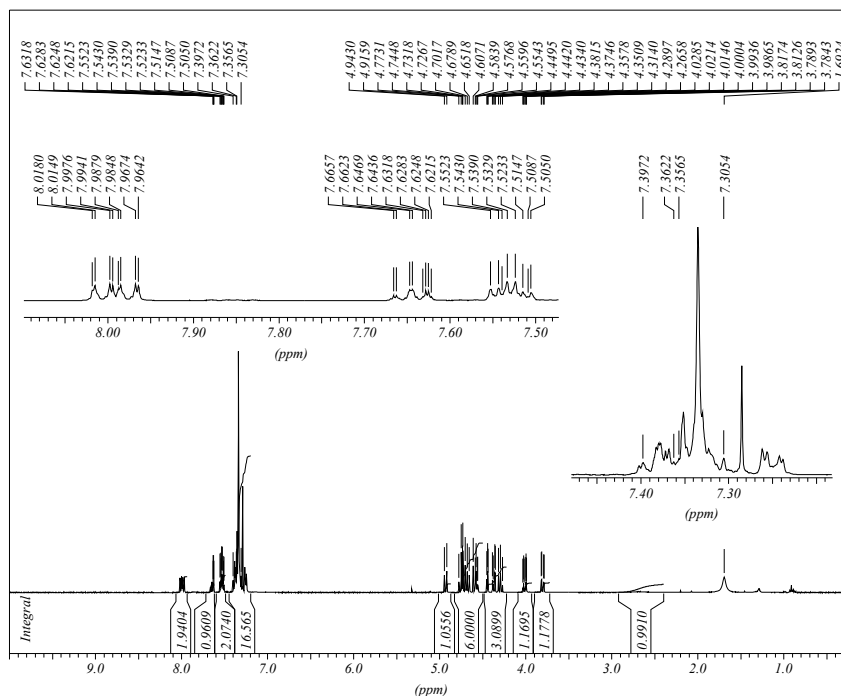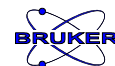

\*\*\* Current Data Parameters \*\*\*  
 NAME : DF080  
 EXPNO : 312  
 PROCNO : 0  
 \*\*\* Acquisition Parameters \*\*\*  
 DATE\_1 : 08:16:13  
 DATE\_d : Sep 18 2008  
 DE : 6.0 usec  
 DS : 2  
 NS : 32  
 NUC1 : 1H  
 O1 : 2470.97 Hz  
 O2 : 2470.97 Hz  
 PROBHD : 5 mm PAQNP Switch-1H Z-GRD Z84  
 RG : 161.3000031  
 SFO1 : 400.1324710 MHz  
 SW : 11.9692 ppm  
 SW\_h : 4789.272 Hz  
 TD : 65536  
 \*\*\* Processing Parameters \*\*\*  
 GB : 0.0000000  
 LB : 0.10 Hz  
 PC : 1.00  
 SF : 400.1300000 MHz  
 \*\*\* 1D NMR Plot Parameters \*\*\*  
 Start : 12.16 ppm  
 Stop : 0.19 ppm  
 SR : 0.00 Hz  
 ppm\_cm : 0.57  
 Hz\_cm : 226.98

Zoom in proton NMR with Gaussian Fourier transformation (LB = -1 and GB = 10%)



DF080-c-PROTON CDCl3 opt/topspin cristau 9

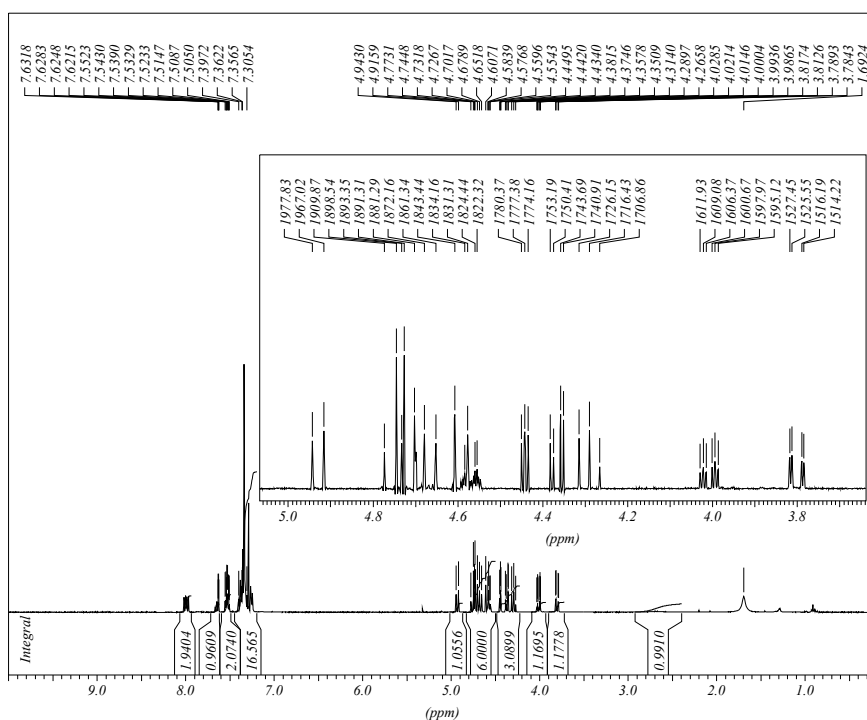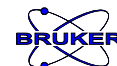

\*\*\* Current Data Parameters \*\*\*  
 NAME : DF080  
 EXPNO : 312  
 PROCNO : 0  
 \*\*\* Acquisition Parameters \*\*\*  
 DATE\_t : 08:16:13  
 DATE\_d : Sep 18 2008  
 DE : 6.0 usec  
 DS : 2  
 NS : 32  
 NUC1 : 1H  
 O1 : 2470.97 Hz  
 O2 : 2470.97 Hz  
 PROBHD : 5 mm PAQNP Switch-1H Z-GRD Z84  
 RG : 161.3000031  
 SFO1 : 400.1324710 MHz  
 SW : 11.9692 ppm  
 SW\_h : 4789.272 Hz  
 TD : 65536  
 \*\*\* Processing Parameters \*\*\*  
 GB : 0.1500000  
 LB : -1.00 Hz  
 PC : 1.00  
 SF : 400.1300000 MHz  
 \*\*\* 1D NMR Plot Parameters \*\*\*  
 Start : 12.16 ppm  
 Stop : 0.19 ppm  
 SR : 0.00 Hz  
 ppm\_cm : 0.57  
 Hz\_cm : 226.98

### <sup>13</sup>C NMR – CDCl<sub>3</sub>

DF080C13APT CDCl3 opt/topspin am2n1 55

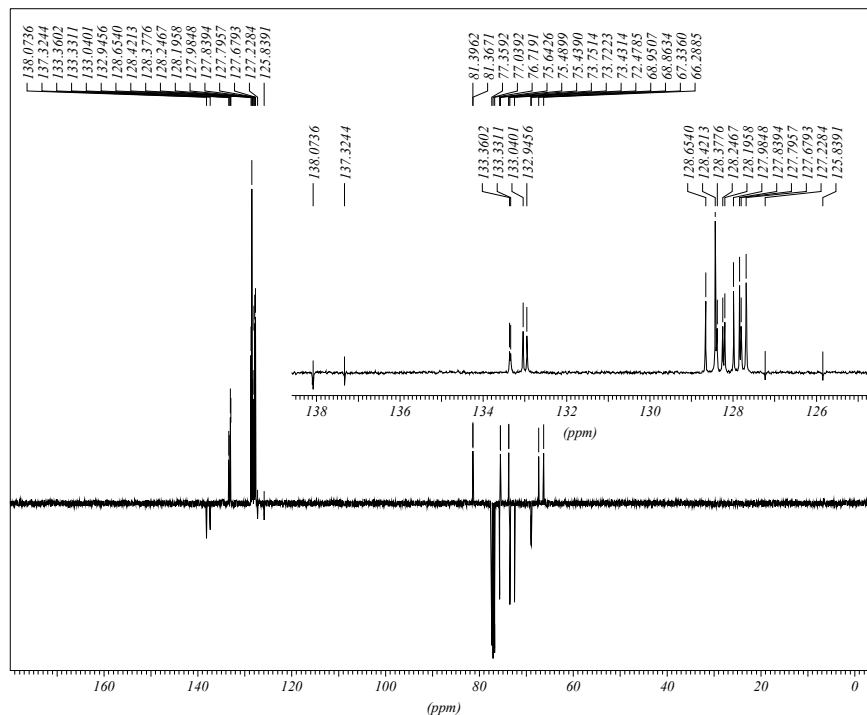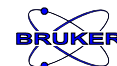

\*\*\* Current Data Parameters \*\*\*  
 NAME : 2010-0-1  
 EXPNO : 313  
 PROCNO : 0  
 \*\*\* Acquisition Parameters \*\*\*  
 DATE\_t : 19:52:43  
 DATE\_d : May 10 2010  
 DE : 8.0 usec  
 DS : 4  
 NS : 1024  
 NUC1 : 13C  
 O1 : 10060.80 Hz  
 O2 : 1600.52 Hz  
 PROBHD : 5 mm PAQNP Switch-1H Z-GRD Z84  
 RG : 16384.0000000  
 SFO1 : 100.6228298 MHz  
 SW : 238.3238 ppm  
 SW\_h : 23980.815 Hz  
 TD : 65536  
 \*\*\* Processing Parameters \*\*\*  
 GB : 0.0000000  
 LB : 1.00 Hz  
 PC : 1.40  
 SF : 100.6127690 MHz  
 \*\*\* 1D NMR Plot Parameters \*\*\*  
 Start : 219.17 ppm  
 Stop : -19.18 ppm  
 SR : 0.00 Hz  
 ppm\_cm : 11.30  
 Hz\_cm : 1136.53

DF080C13APT CDCl3 op/topspin am2n1 55

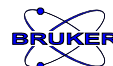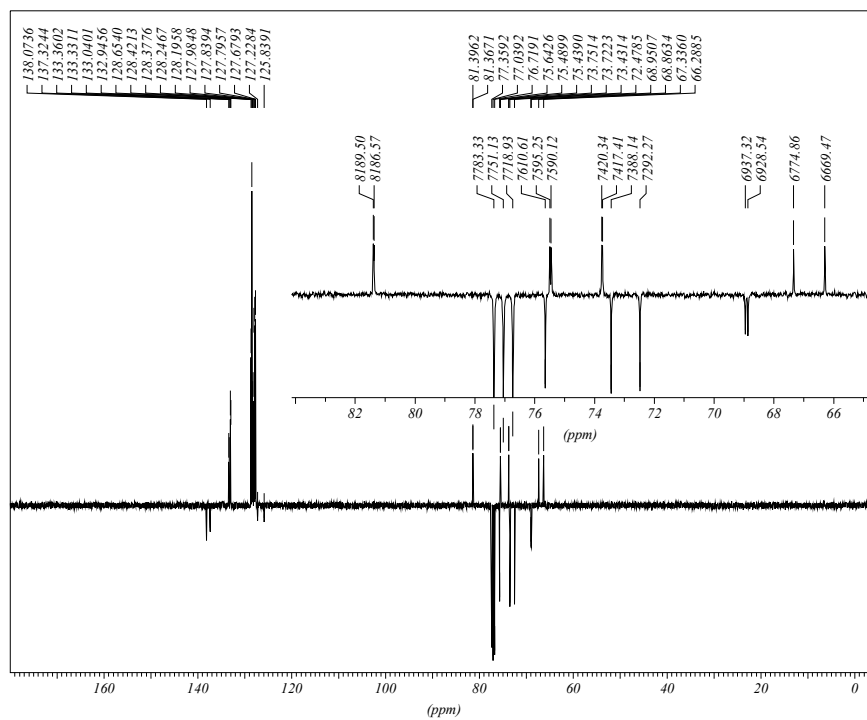

\*\*\* Current Data Parameters \*\*\*  
 NAME : 2010-0-1  
 EXPNO : 313  
 PROCNO : 0  
 \*\*\* Acquisition Parameters \*\*\*  
 DATE\_1 : 19:52:43  
 DATE\_d : May 10 2010  
 DE : 8.0 usec  
 DS : 4  
 NS : 1024  
 NUC1 : 13C  
 O1 : 10060.80 Hz  
 O2 : 1600.52 Hz  
 PROBHD : 5 mm PAQNP Switch-1H-Z-GRD Z84  
 RG : 16384.000000  
 SFO1 : 100.6228298 MHz  
 SW : 238.3238 ppm  
 SW\_h : 23980.815 Hz  
 TD : 65536  
 \*\*\* Processing Parameters \*\*\*  
 GB : 0.000000  
 LB : 1.00 Hz  
 PC : 1.40  
 SF : 100.6127690 MHz  
 \*\*\* 1D NMR Plot Parameters \*\*\*  
 Start : 219.17 ppm  
 Stop : -19.18 ppm  
 SR : 0.00 Hz  
 ppm\_cm : 11.30  
 Hz\_cm : 1136.53

# Analytical HPLC

07/02/2011 11:44:11 1 / 2

## ==== Shimadzu LCsolution Analysis Report ====

C:\LabSolutions\Data\Project1\Delphine\semi prep vial 1 21052010.lcd  
Acquired by : Admin  
Sample Name : semi prep vial 1 21052010  
Sample ID : semi prep vial 1 21052010  
Tray# : 1  
Vial # : 22  
Injection Volume : 20 uL  
Data File Name : semi prep vial 1 21052010.lcd  
Method File Name : isocratique 63-C- 20 min.lcm  
Batch File Name : semi prep 63C-26052010-1.lcb  
Report File Name : delphine report.lcr  
Data Acquired : 26/05/2010 10:30:50  
Data Processed : 07/02/2011 11:40:28

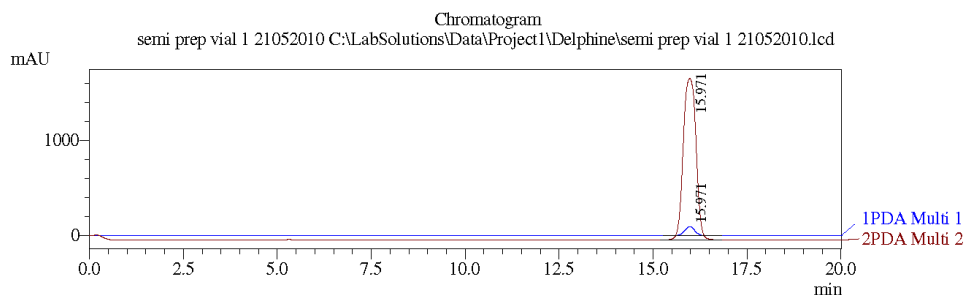

- 1 PDA Multi 1 / 254nm 4nm
- 2 PDA Multi 2 / 214nm 4nm

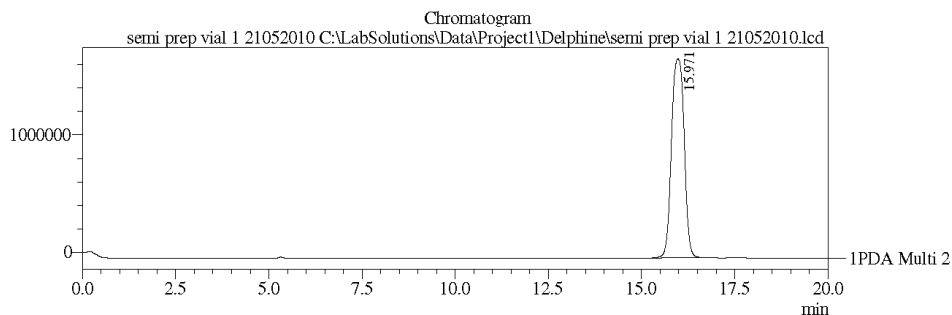

- 1 PDA Multi 2 / 214nm 4nm

### PeakTable

PDA Ch2 214nm 4nm

| Pic   | Temps ret. | Hauteur | Aire     | Hauteur % | Aire %  |
|-------|------------|---------|----------|-----------|---------|
| 1     | 15.971     | 1693771 | 39953700 | 100.000   | 100.000 |
| Total |            | 1693771 | 39953700 | 100.000   | 100.000 |

C:\LabSolutions\Data\Project1\Delphine\semi prep vial 1 21052010.lcd

PeakTable

| PDA Ch1 254nm 4nm |            |         |         |           |         |
|-------------------|------------|---------|---------|-----------|---------|
| Pic               | Temps rét. | Hauteur | Aire    | % Hauteur | Area %  |
| 1                 | 15.971     | 95583   | 1813225 | 100.000   | 100.000 |
| Total             |            | 95583   | 1813225 | 100.000   | 100.000 |

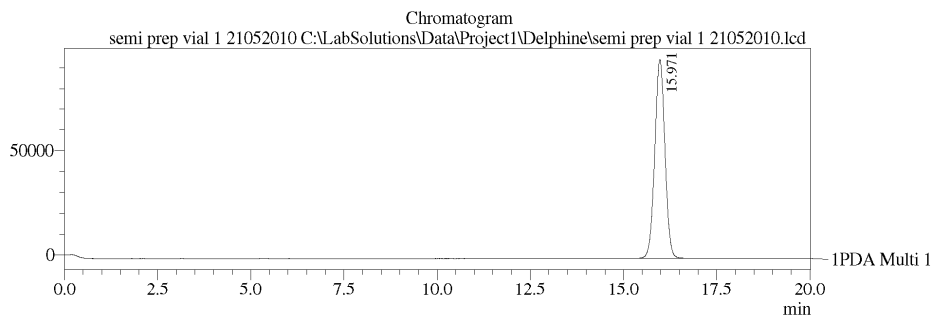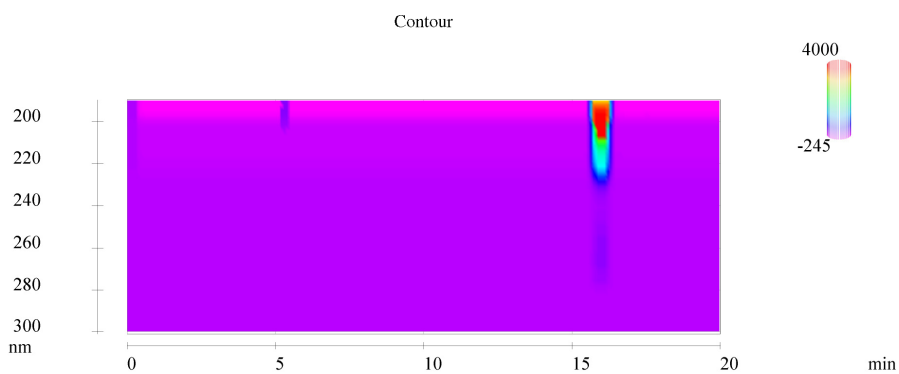

| <<LC Program>> |            | Method  |       |  | Comment |
|----------------|------------|---------|-------|--|---------|
| Time           | Unit       | Command | Value |  |         |
| 0.01           | Pumps      | C.Conc  | 63    |  |         |
| 0.01           | Pumps      | T.Flow  | 1     |  |         |
| 20.00          | Controller | Stop    |       |  |         |

C:\LabSolutions\Data\Project1\Delphine\semi prep vial 1 21052010.lcd

## Elemental Composition Report

Page 1

### Single Mass Analysis

Tolerance = 3.0 mDa / DBE: min = 0.0, max = 100.0

Isotope cluster parameters: Separation = 1.0 Abundance = 1.0%

Monoisotopic Mass, Odd and Even Electron Ions

59 formula(e) evaluated with 1 results within limits (all results (up to 1000) for each mass)

Q-TOF DF080 / Mmono = 544.20 16-FEB-2011  
y-jp11021623 9 (0.171) Cn (Cen,4, 80.00, Ar); Sm (SG, 10x1.00); Cm (5:11) TOF MS ES+  
3.25e3

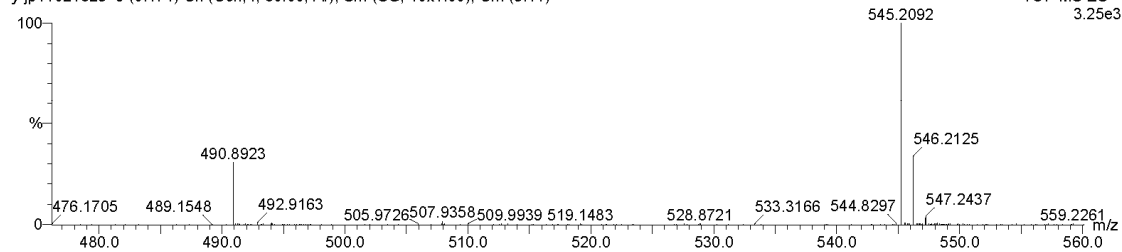

Minimum: 0.0  
Maximum: 3.0 5.0 100.0

| Mass     | Calc. Mass | mDa  | PPM  | DBE  | Score | Formula      |
|----------|------------|------|------|------|-------|--------------|
| 545.2092 | 545.2093   | -0.1 | -0.2 | 16.5 | 1     | C32 H34 O6 P |

**2S,3S,4S,5S,6R)-4,5-bis-benzyloxy-6-benzyloxymethyl-2-phenyl-2-oxo-2λ5-[1,2]oxaphosphinan-3-ol 4:**

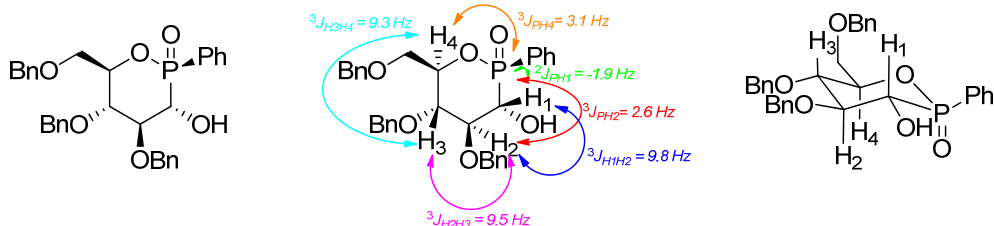

White powder

$^{31}\text{P}$  NMR (161.97 MHz,  $\text{CDCl}_3$ ):  $\delta$  (ppm) = 36.08 (s);  $^1\text{H}$  NMR (400.13 MHz,  $\text{CDCl}_3$ ): 3.69 (dd,  $^2J_{\text{HH}} = -11.1$  Hz,  $^3J_{\text{HH}} = 2.3$  Hz, 1H,  $\text{CH}_2$ ); 3.88 (ddd,  $^2J_{\text{HH}} = 11.1$  Hz,  $^3J_{\text{HH}} = 2.74$  Hz,  $^4J_{\text{PH}} = 2.6$  Hz, 1H,  $\text{CH}_2$ ); 3.90 (dd,  $^3J_{\text{HH}} = 9.5$  Hz,  $^3J_{\text{HH}} = 9.3$  Hz, 1H,  $\text{PCCCH}$ ); 3.93 (dd,  $^3J_{\text{HH}} = 9.8$  Hz,  $^2J_{\text{PH}} = -1.9$  Hz, 1H,  $\text{PCH}$ ); 4.10 (ddd,  $^3J_{\text{HH}} = 9.8$  Hz,  $^3J_{\text{HH}} = 9.5$  Hz,  $^3J_{\text{PH}} = 2.6$  Hz, 1H,  $\text{PCCH}$ ); 4.46 (dddd,  $^3J_{\text{HH}} = 9.3$  Hz,  $^3J_{\text{PH}} = 3.1$  Hz,  $J_{\text{HH}} = 2.7$  Hz,  $^3J_{\text{HH}} = 2.3$  Hz, 1H,  $\text{POCH}$ ); 4.46 (d,  $^2J_{\text{HH}} = -12.1$  Hz, 1H,  $\text{PhCH}_2$ ); 4.54 (d,  $^2J_{\text{HH}} = -12.1$  Hz, 1H,  $\text{PhCH}_2$ ); 4.59 (d,  $^2J_{\text{HH}} = -10.8$  Hz, 1H,  $\text{PhCH}_2$ ); 4.83 (d,  $^2J_{\text{HH}} = -11.1$  Hz, 1H,  $\text{PhCH}_2$ ); 4.84 (d,  $^2J_{\text{HH}} = -10.8$  Hz, 1H,  $\text{PhCH}_2$ ); 4.88 (d,  $^2J_{\text{HH}} = -11.1$  Hz, 1H,  $\text{PhCH}_2$ ); 7.38-7.43 (m, 15H,  $\text{CH}_{\text{Ar}}$ ); 7.50-7.55 (m, 3H,  $\text{CH}_{\text{Ar}}$ ); 7.75-7.80 (m, 2H,  $\text{CH}_{\text{Ar}}$ );  $^{13}\text{C}$  NMR (400.13 MHz,  $\text{CDCl}_3$ ):  $\delta$  (ppm) = 68.64 (d,  $^3J_{\text{CP}} = 9.2$  Hz,  $\text{OCCH}_2$ ), 72.19 (d,  $^1J_{\text{CP}} = 97.3$  Hz,  $\text{PCH}$ ), 73.45 (s,  $\text{PhCH}_2$ ), 75.24 (d,  $^2J_{\text{CP}} = 5.2$  Hz,  $\text{POCH}$ ), 75.50 (s,  $\text{PhCH}_2$ ), 76.25 (s,  $\text{PhCH}_2$ ), 77.65 (s,  $\text{PCCCH}$ ), 84.34 (d,  $^2J_{\text{CP}} = 6.9$  Hz,  $\text{PCCH}$ ), 127.65, 127.76, 127.82, 127.84, 128.15, 128.45 (s,  $\text{CH}_{\text{Bn}}$ ), 127.49 (d,  $^1J_{\text{CP}} = 135.8$  Hz,  $\text{PC}_{\text{Ph}}$ ), 128.71 (d,  $^3J_{\text{CP}} = 13.4$  Hz,  $\text{CH}_{\text{Ph}}$ ), 131.91 (d,  $^2J_{\text{CP}} = 10.4$  Hz,  $\text{CH}_{\text{Ph}}$ ), 133.30 (d,  $^4J_{\text{CP}} = 2.8$  Hz,  $\text{CH}_{\text{Ph}}$ ), 137.92 (s,  $\text{C}_{\text{Bn}}$ ), 137.98 (s,  $\text{C}_{\text{Bn}}$ ), 138.37 (s,  $\text{C}_{\text{Bn}}$ ); HRMS  $m/z$  ( $\text{MH}^+$ ) 545.2091 (calcd for  $\text{C}_{32}\text{H}_{34}\text{O}_6\text{P}$ : 545.2093); Analytical HPLC (Column: Waters SunFire™ C18, 5  $\mu\text{m}$ , 4.6 $\times$ 250 mm; Eluent: acetonitrile / water (63:37), Flow: 1  $\text{mL}\cdot\text{min}^{-1}$ ): Retention time = 18.53.  $[\alpha]_{\text{D}}^{25} = +26.18$  ( $c$  0.055,  $\text{CHCl}_3$ ). HRMS  $m/z$  ( $\text{MH}^+$ ) 545.2091 (calcd for  $\text{C}_{32}\text{H}_{34}\text{O}_6\text{P}$ : 545.2093); Analytical HPLC (Column: Waters SunFire™, C18, 5  $\mu\text{m}$ , 4.6 $\times$ 250 mm; Eluent: acetonitrile/water (63:37); Flow: 1  $\text{mL}\cdot\text{min}^{-1}$ ): Retention time = 18.53.

The  $^1\text{H}$  NMR data of compound 4, epimer of compound 3, showed trans di-axial vicinal coupling constants between protons  $\text{H}_2/\text{H}_3$  ( $J_{\text{H}_2-\text{H}_3} = 9.5$  Hz), protons  $\text{H}_3/\text{H}_4$  ( $J_{\text{H}_3-\text{H}_4} = 9.3$  Hz) and protons  $\text{H}_1/\text{H}_2$  ( $J_{\text{H}_1-\text{H}_2} = 9.8$  Hz) who confirmed a chair structure with  $\text{P}_2(\text{S})$  and  $\text{C}_3(\text{S})$  configuration for compound 4.

$^{31}\text{P}$  NMR –  $\text{CDCl}_3$

SL008+003-LC430-CDCl3-P31CPDP31CPD CDCl3 opt/topspin am2n1 32

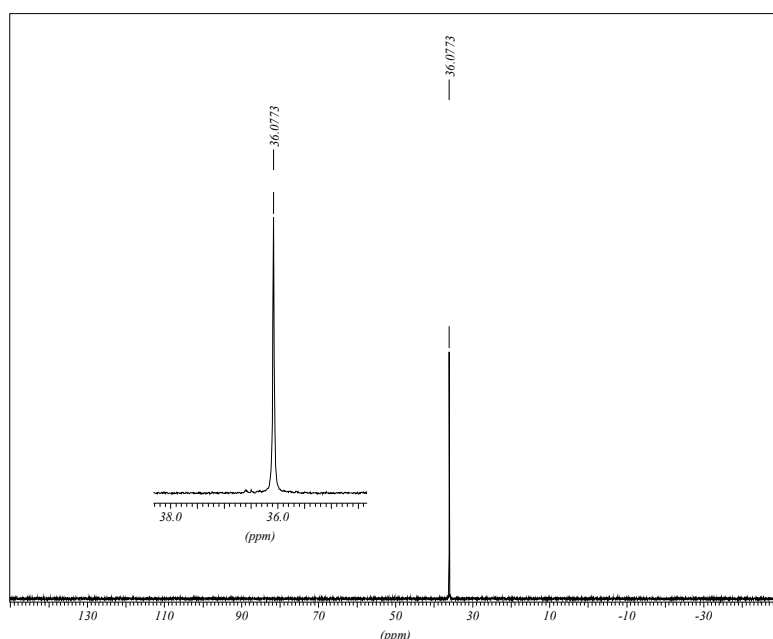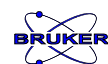

```

*** Current Data Parameters ***
NAME      : sl008_1
EXPNO     : 551
PROCNO    : 0
*** Acquisition Parameters ***
DATE_1    : 08:07:25
DATE_2    : Nov 22 2010
DE        : 8.0 usec
DS        : 4
NS        : 64
NUC1      : 31P
O1        : 8098.78 Hz
O2        : 1600.52 Hz
PROBHD    : 5 mm PAQNP Switch-1H Z-GRD ZS40
RG        : 20642.500000
SFO1      : 161.9836718 MHz
SW        : 200.4371 ppm
SW_Hz     : 32467.532 Hz
TD        : 65536
*** Processing Parameters ***
GB        : 0.000000
LB        : 1.00 Hz
PC        : 1.40
SF        : 161.9755730 MHz
*** 1D NMR Plot Parameters ***
Start     : 150.22 ppm
Stop      : -50.22 ppm
SR        : 0.01 Hz
ppm_cm    : 9.50
Hz_cm     : 1538.75
    
```

<sup>1</sup>H NMR – CDCl<sub>3</sub>

SL008+003-LC430-CDCl3-H1PROTON CDCl3 opt/topspin am2n1 32

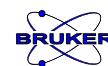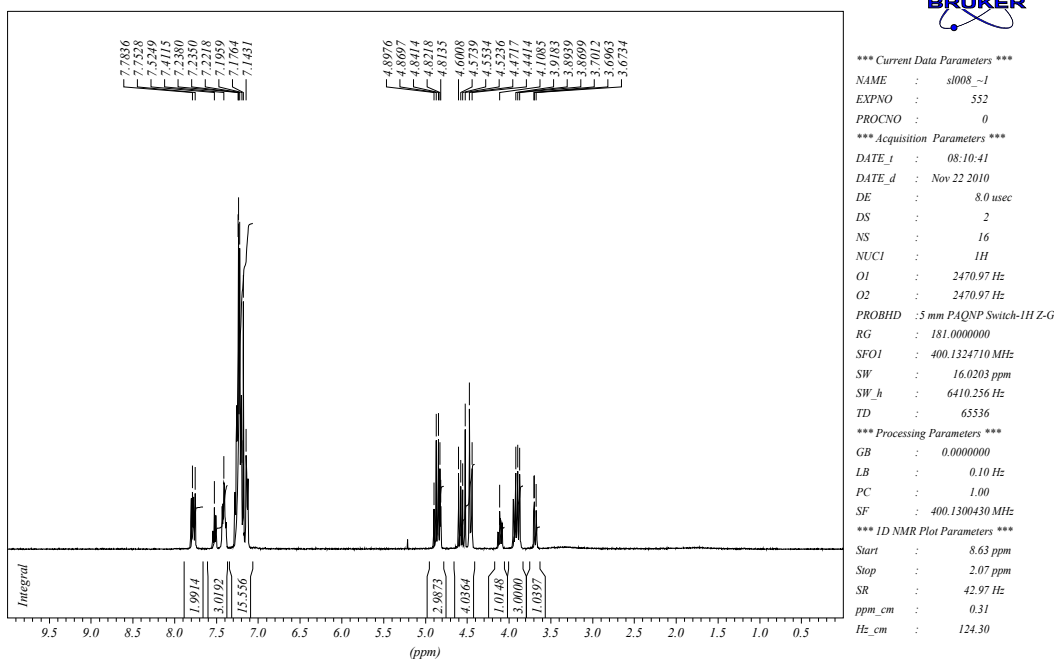

SL008+003-LC430-CDCl3-H1PROTON CDCl3 opt/topspin am2n1 32

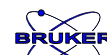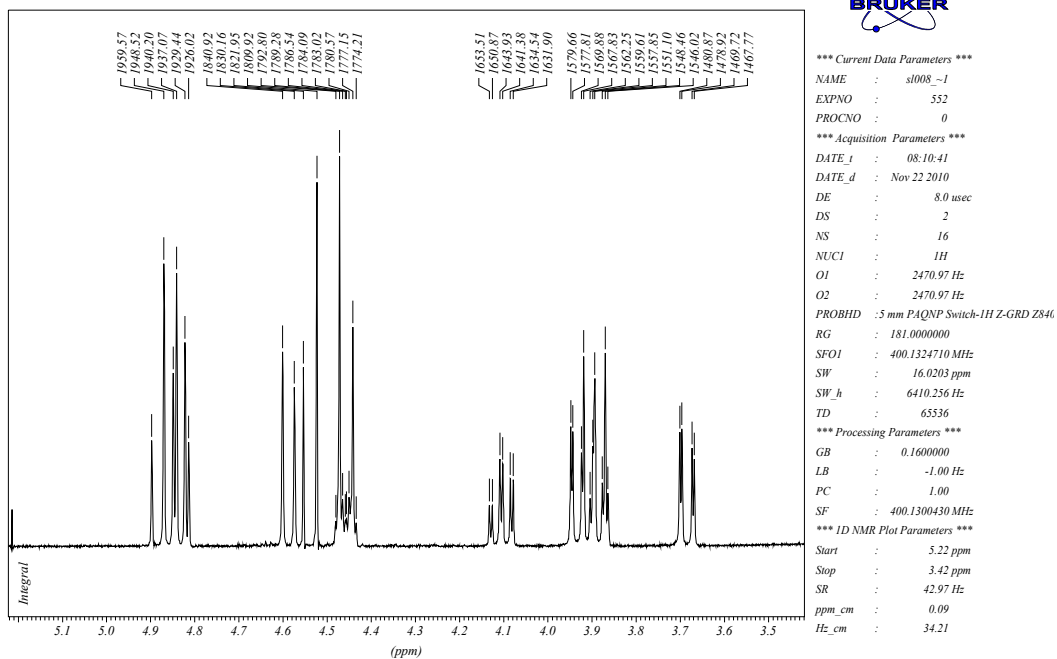

### $^{13}\text{C}$ NMR – $\text{CDCl}_3$

SL008+03, CDC13, 13CC13APT CDC13 opt/topspin cristau 15

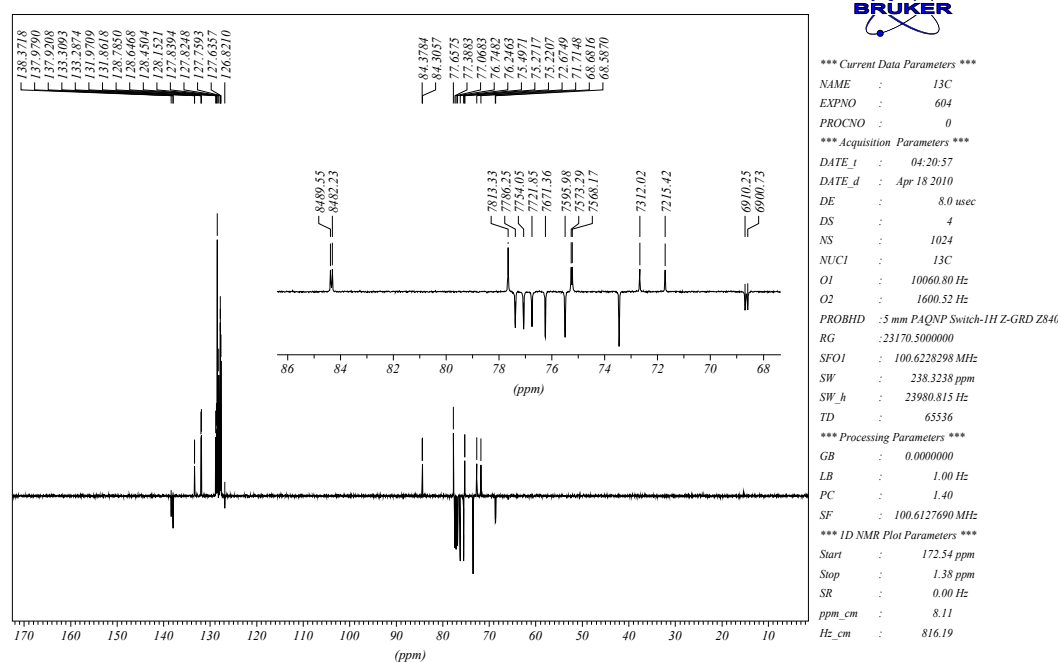

### ES+-MS

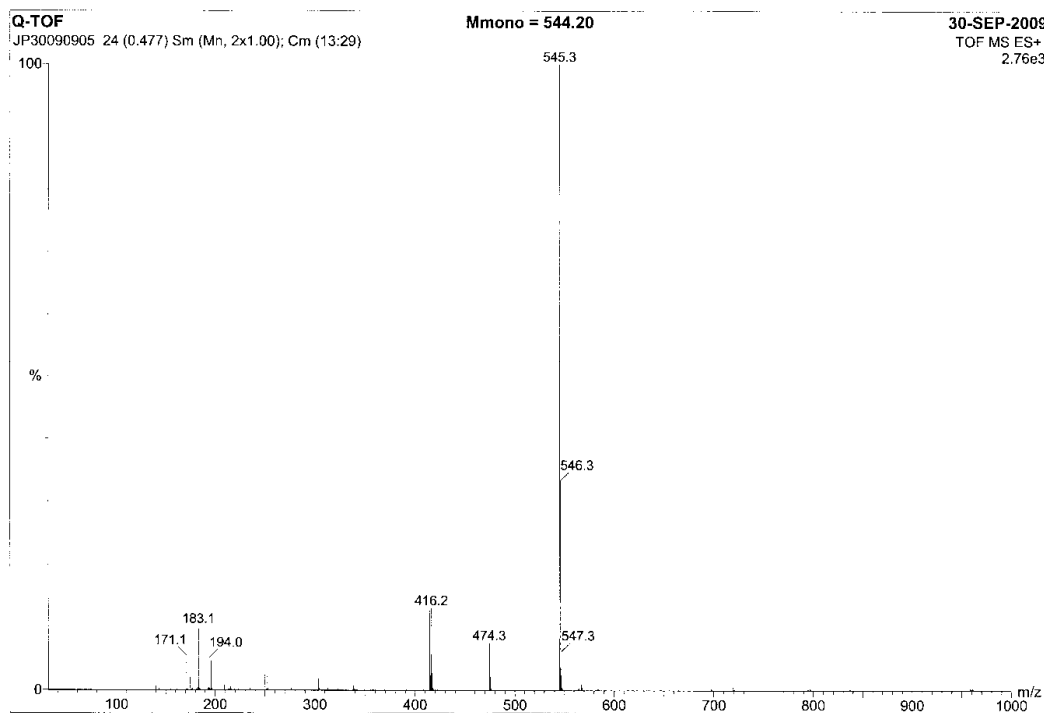



HRMS

Elemental Composition Report

Page 1

Single Mass Analysis

Tolerance = 3.0 mDa / DBE: min = -10.0, max = 100.0

Isotope cluster parameters: Separation = 1.0 Abundance = 1.0%

Monoisotopic Mass, Odd and Even Electron Ions

36 formula(e) evaluated with 1 results within limits (all results (up to 1000) for each mass)

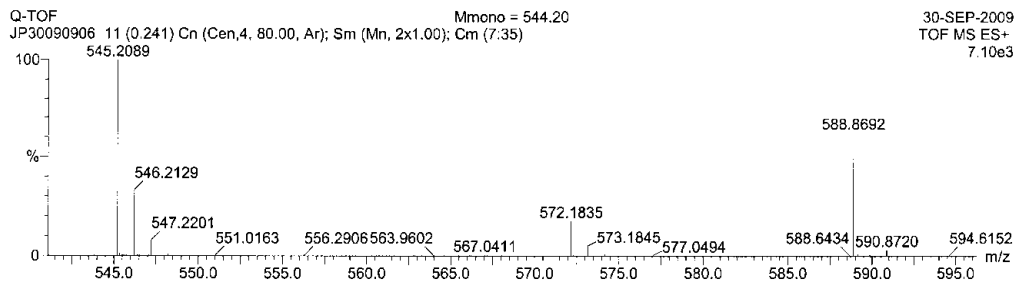

Minimum: -10.0  
Maximum: 100.0

| Mass     | Calc. Mass | mDa  | PPM  | DBE  | Score | Formula      |
|----------|------------|------|------|------|-------|--------------|
| 545.2089 | 545.2093   | -0.4 | -0.7 | 16.5 | 1     | C32 H34 O6 P |

# Analytical HPLC

07/02/2011 11:47:10 1 / 2

## ==== Shimadzu LCsolution Analysis Report ====

C:\LabSolutions\Data\Project1\Delphine\semi prep vial 2 21052010.lcd  
Acquired by : Admin  
Sample Name : semi prep vial 2 21052010  
Sample ID : semi prep vial 2 21052010  
Tray# : 1  
Vail # : 23  
Injection Volume : 20 uL  
Data File Name : semi prep vial 2 21052010.lcd  
Method File Name : isocratique 63-C- 20 min.lcm  
Batch File Name : semi prep 63C-26052010-1.lcb  
Report File Name : delphine report.lcr  
Data Acquired : 26/05/2010 10:51:22  
Data Processed : 07/02/2011 11:46:46

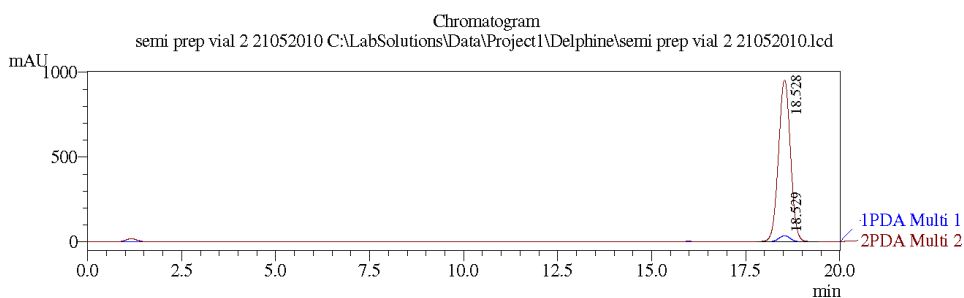

- 1 PDA Multi 1 / 254nm 4nm
- 2 PDA Multi 2 / 214nm 4nm

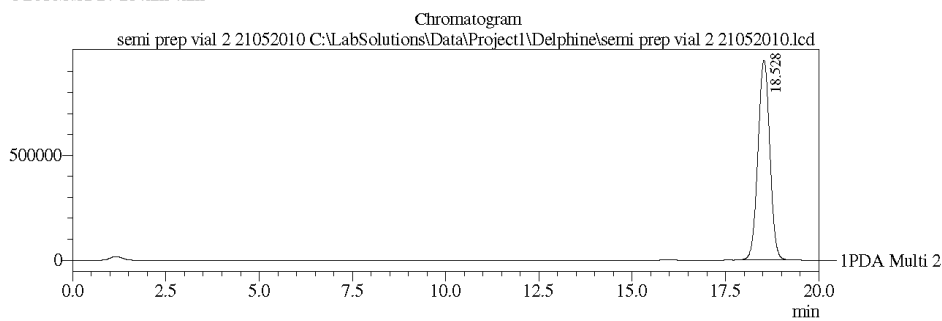

- 1 PDA Multi 2 / 214nm 4nm

PeakTable

| PDA Ch2 214nm 4nm |            |         |          |           |         |  |
|-------------------|------------|---------|----------|-----------|---------|--|
| Pic               | Temps ret. | Hauteur | Aire     | Hauteur % | Aire %  |  |
| 1                 | 18.528     | 951996  | 21043034 | 100.000   | 100.000 |  |
| Total             |            | 951996  | 21043034 | 100.000   | 100.000 |  |

C:\LabSolutions\Data\Project1\Delphine\semi prep vial 2 21052010.lcd

PeakTable

| PDA Ch1 254nm 4nm |            |         |        |           |         |
|-------------------|------------|---------|--------|-----------|---------|
| Pic               | Temps rét. | Hauteur | Aire   | % Hauteur | Area %  |
| 1                 | 18.529     | 35833   | 778565 | 100.000   | 100.000 |
| Total             |            | 35833   | 778565 | 100.000   | 100.000 |

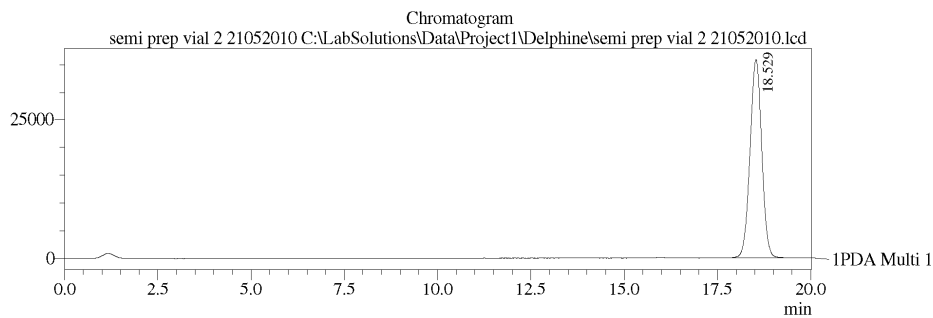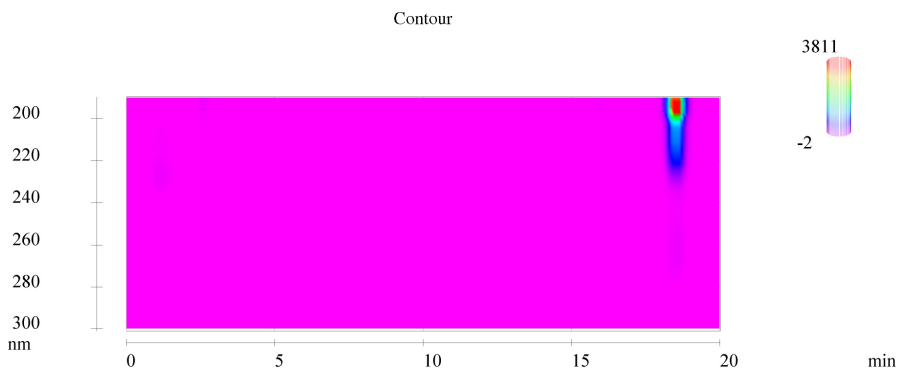

| <<LC Program>> |            | Method  |       |         |  |
|----------------|------------|---------|-------|---------|--|
| Time           | Unit       | Command | Value | Comment |  |
| 0.01           | Pumps      | C.Conc  | 63    |         |  |
| 0.01           | Pumps      | T.Flow  | 1     |         |  |
| 20.00          | Controller | Stop    |       |         |  |

C:\LabSolutions\Data\Project1\Delphine\semi prep vial 2 21052010.lcd

## Preparation of (*R<sub>P</sub>*)-4,5-bis-benzyloxy-6-benzyloxymethyl-2-phenyl-2-oxo-2λ<sup>5</sup>-[1,2]oxaphosphinan-3-one **7**:

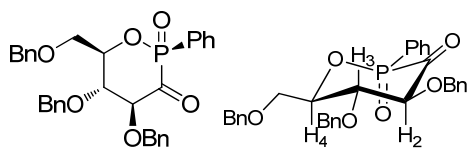

Dess-Martin periodinane (0.956 g, 2.25 mmol) and *tert*-butanol (0.167 g, 0.215 mL, 2.250 mmol) were added to a solution of a mixture of **3/4** (40/60, 0.408 g, 0.750 mmol) in dichloromethane (20 mL). The reaction mixture was stirred at room temperature for 6 h, and then dichloromethane (10 mL) was added. The reaction mixture was filtrated through celite, organic layer was washed with an aqueous solution of sodium sulfite (20 mL, 20%), followed by an aqueous solution of carbonate sodium (20 mL, 20%). The organic layer was dried over magnesium sulfate and filtered. The solvent was evaporated to give an oil (0.4 g, 89%), which was used directly without further purification.

<sup>31</sup>P NMR (161.97 MHz, CDCl<sub>3</sub>): δ (ppm): 23.64 (s); <sup>1</sup>H NMR (400.13 MHz, CDCl<sub>3</sub>): 4.18 (t, <sup>3</sup>J<sub>HH</sub> = 9.6 Hz, 1H, PCCCH); HRMS *m/z* (MH<sup>+</sup>) 543.1934 (calcd for C<sub>32</sub>H<sub>32</sub>O<sub>6</sub>P: 543.1937).

The <sup>1</sup>H NMR data of compound **7**, showed *trans* di-axial vicinal coupling constants between protons H<sub>3</sub>/H<sub>2</sub> (*J*<sub>H<sub>3</sub>-H<sub>2</sub></sub> = 9.6 Hz) and protons H<sub>3</sub>/H<sub>4</sub> (*J*<sub>H<sub>3</sub>-H<sub>4</sub></sub> = 9.6 Hz) which confirmed a chair structure for compound **7**.

<sup>31</sup>P NMR spectrum of **7**.

SELO-057-CDCl3-P31CPDP31CPD CDCl3 opt/topspin am2n1 30

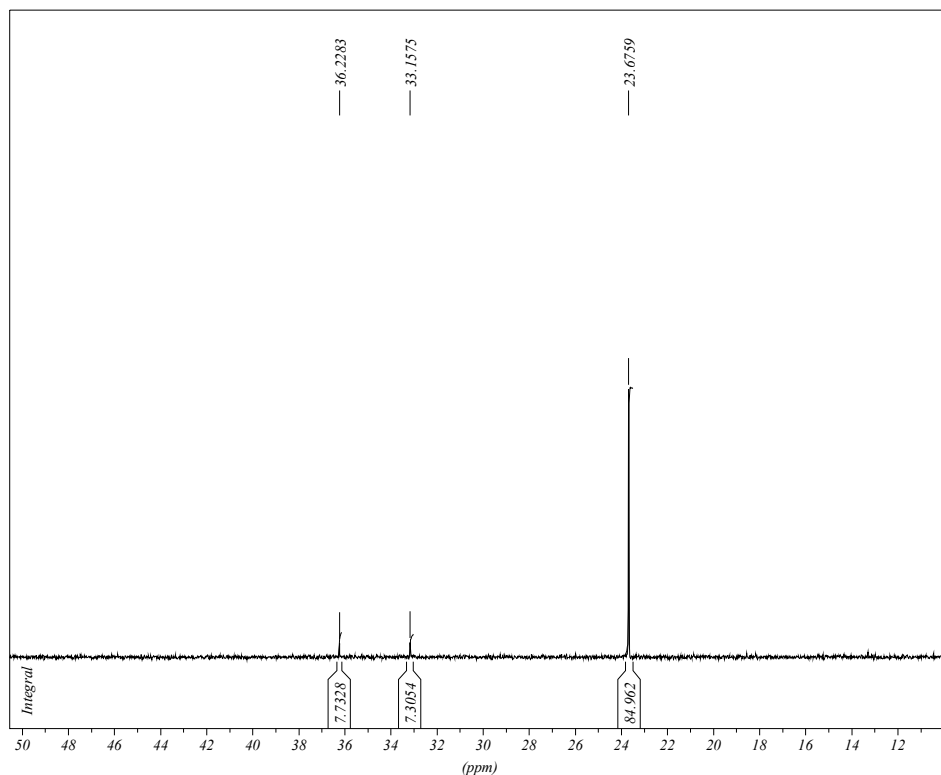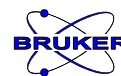

\*\*\* Current Data Parameters \*\*\*

NAME : 057  
EXPNO : 555  
PROCNO : 0

\*\*\* Acquisition Parameters \*\*\*

DATE\_1 : 00:17:56  
DATE\_2 : Nov 17 2011

DE : 8.0 usec  
DS : 4  
NS : 16  
NUC1 : 31P

O1 : -8078.82 Hz  
O2 : 1600.52 Hz

PROBHD : 5 mm PABBO BB/19F-1H/D Z-GRD Z  
RG : 20642.5000000

SFO1 : 161.9674942 MHz  
SW : 400.9142 ppm  
SW\_h : 64933.065 Hz  
TD : 65536

\*\*\* Processing Parameters \*\*\*

GB : 0.0000000  
LB : 1.00 Hz  
PC : 1.40

SF : 161.9753730 MHz

\*\*\* 1D NMR Plot Parameters \*\*\*  
Start : 50.55 ppm  
Stop : 9.70 ppm  
SR : 0.01 Hz  
ppm\_cm : 1.94  
Hz\_cm : 313.59

# <sup>1</sup>H NMR spectrum of 7.

SELO-057-protondecP31-CDCl3PROP31DEC CDCl3 opt/topspin am2n1 5

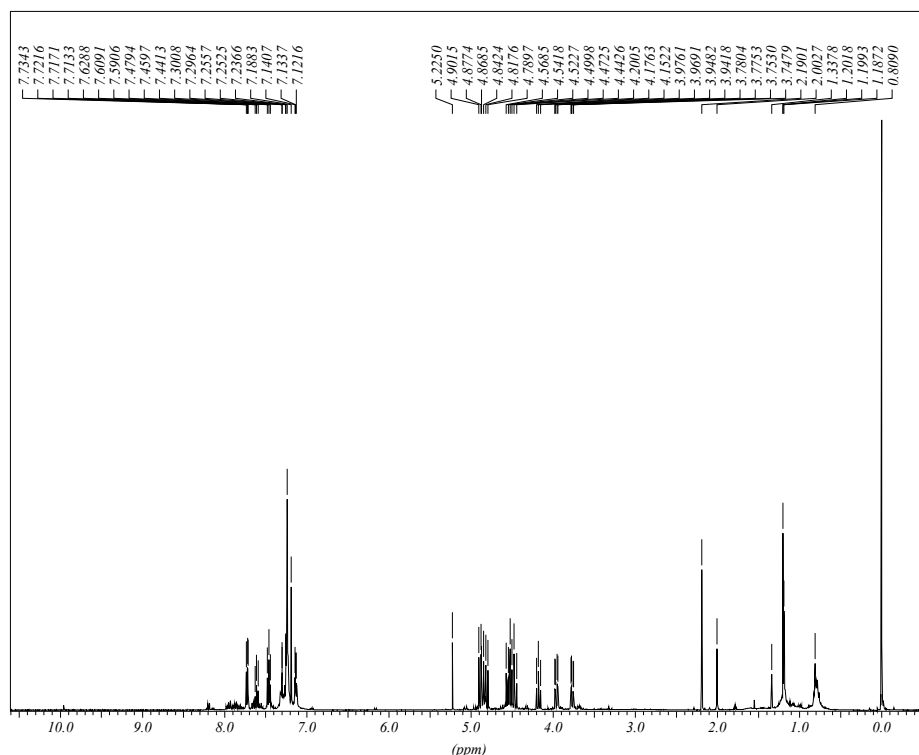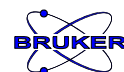

```

*** Current Data Parameters ***
NAME      : 057a
EXPNO    : 551
PROCNO   : 0
*** Acquisition Parameters ***
DATE_t   : 02:40:33
DATE_d   : Nov 17 2011
DE       : 8.0 usec
DS       : 2
NS       : 16
NUC1    : 1H
O1      : 2501.84 Hz
O2      : 491.83 Hz
PROBHD  : 5 mm PABBO BB/19F-1H/D Z-GRD Z
RG       : 90.5000000
SFO1    : 400.1325018 MHz
SW      : 20.8264 ppm
SW_h    : 8333.333 Hz
TD      : 32768
*** Processing Parameters ***
GB       : 0.0000000
LB       : 0.10 Hz
PC       : 1.40
SF       : 400.1300383 MHz
*** 1D NMR Plot Parameters ***
Start    : 10.61 ppm
Stop     : -0.55 ppm
SR       : 38.32 Hz
ppm_cm  : 0.53
Hz_cm   : 211.68
    
```

SELO-057-proton-CDCl3

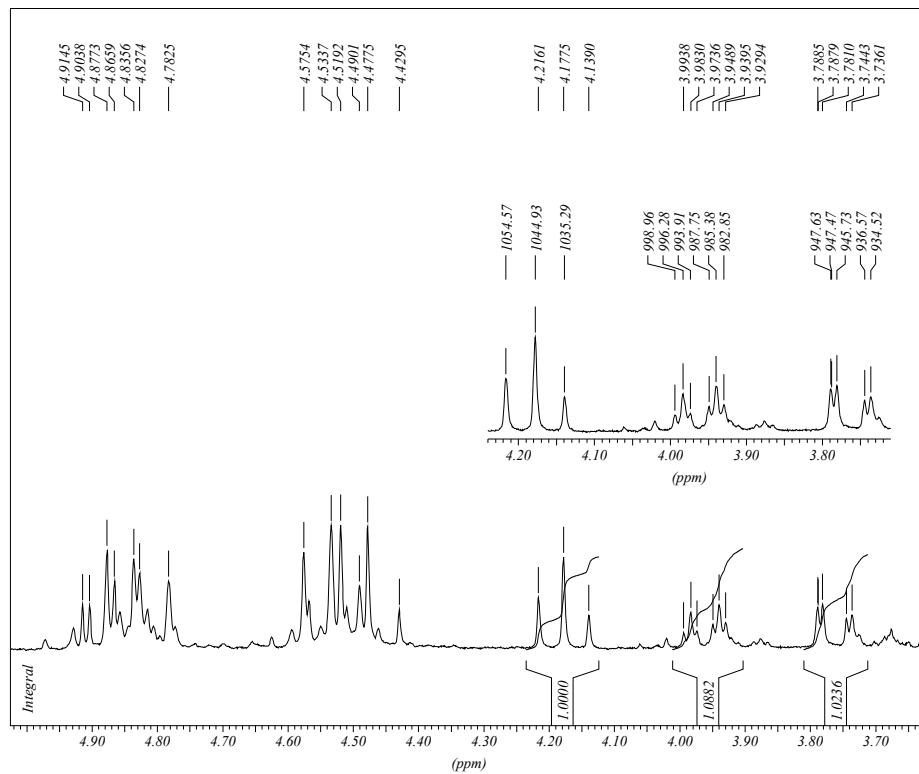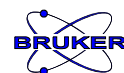

```

*** Current Data Parameters ***
NAME      : 057
EXPNO    : 551
PROCNO   : 0
*** Acquisition Parameters ***
DATE_t   : 09:14:55
DATE_d   : Nov 16 2011
DE       : 10.0 usec
DS       : 2
NS       : 16
NUC1    : 1H
O1      : 1544.66 Hz
O2      : 1544.66 Hz
PROBHD  : 5 mm QNP 1H/13C/31P/19F Z-GRD Z
RG       : 512.0000000
SFO1    : 250.1315447 MHz
SW      : 20.6930 ppm
SW_h    : 5175.983 Hz
TD      : 65536
*** Processing Parameters ***
GB       : 0.0000000
LB       : 0.10 Hz
PC       : 1.00
SF       : 250.1300187 MHz
*** 1D NMR Plot Parameters ***
Start    : 5.03 ppm
Stop     : 3.62 ppm
SR       : 18.74 Hz
ppm_cm  : 0.07
Hz_cm   : 16.65
    
```

# <sup>1</sup>H NMR spectrum of **7** (Proton with Phosphorus decoupling).

SELO-057-protondecP31-CDCI3PROP31DEC CDCI3 opt/topspin am2n1 5

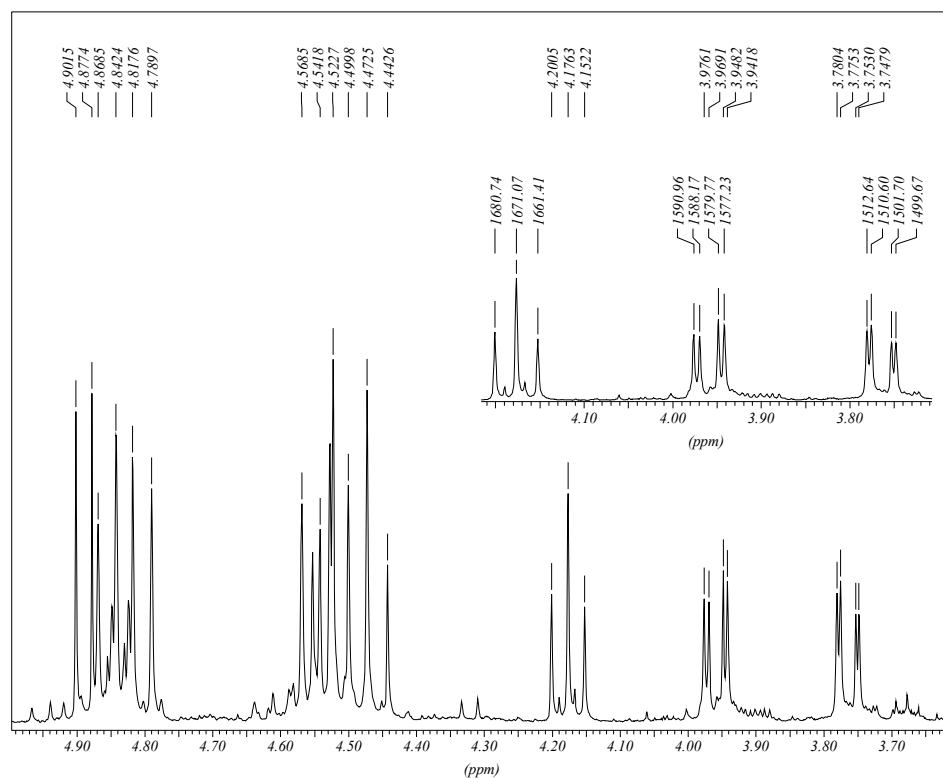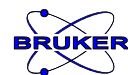

\*\*\* Current Data Parameters \*\*\*  
 NAME : 057a  
 EXPNO : 551  
 PROCNO : 0  
 \*\*\* Acquisition Parameters \*\*\*  
 DATE\_1 : 02:40:33  
 DATE\_d : Nov 17 2011  
 DE : 8.0 usec  
 DS : 2  
 NS : 16  
 NUC1 : <sup>1</sup>H  
 O1 : 2501.84 Hz  
 O2 : 491.83 Hz  
 PROBHD : 5 mm PABBO BB/19F-1H/D Z-GRD Z  
 RG : 90.5000000  
 SFO1 : 400.1325018 MHz  
 SW : 20.8264 ppm  
 SW\_h : 8333.333 Hz  
 TD : 32768  
 \*\*\* Processing Parameters \*\*\*  
 GB : 0.0000000  
 LB : 0.10 Hz  
 PC : 1.40  
 SF : 400.1300383 MHz  
 \*\*\* 1D NMR Plot Parameters \*\*\*  
 Start : 5.00 ppm  
 Stop : 3.61 ppm  
 SR : 38.32 Hz  
 ppm\_cm : 0.07  
 Hz\_cm : 26.29

# <sup>13</sup>C NMR spectrum of **7**.

DF270C13APT CDCI3 opt/topspin am2n1 11

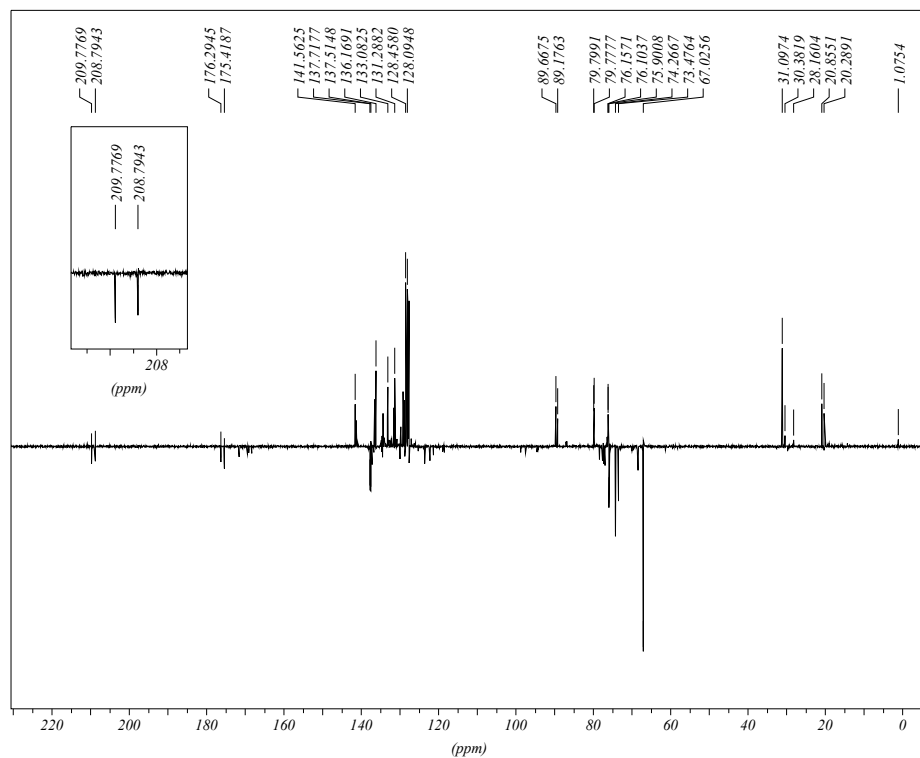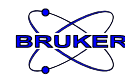

\*\*\* Current Data Parameters \*\*\*  
 NAME : rnm  
 EXPNO : 323  
 PROCNO : 0  
 \*\*\* Acquisition Parameters \*\*\*  
 DATE\_1 : 18:01:49  
 DATE\_d : Jun 02 2010  
 DE : 8.0 usec  
 DS : 4  
 NS : 1024  
 NUC1 : <sup>13</sup>C  
 O1 : 10060.80 Hz  
 O2 : 1600.52 Hz  
 PROBHD : 5 mm PAQNP Switch-1H Z-GRD Z846  
 RG : 16384.0000000  
 SFO1 : 100.6228298 MHz  
 SW : 349.9332 ppm  
 SW\_h : 35211.268 Hz  
 TD : 65536  
 \*\*\* Processing Parameters \*\*\*  
 GB : 0.0000000  
 LB : 1.00 Hz  
 PC : 1.40  
 SF : 100.6127690 MHz  
 \*\*\* 1D NMR Plot Parameters \*\*\*  
 Start : 230.61 ppm  
 Stop : -6.53 ppm  
 SR : 0.00 Hz  
 ppm\_cm : 11.24  
 Hz\_cm : 1130.79

HRMS of 7

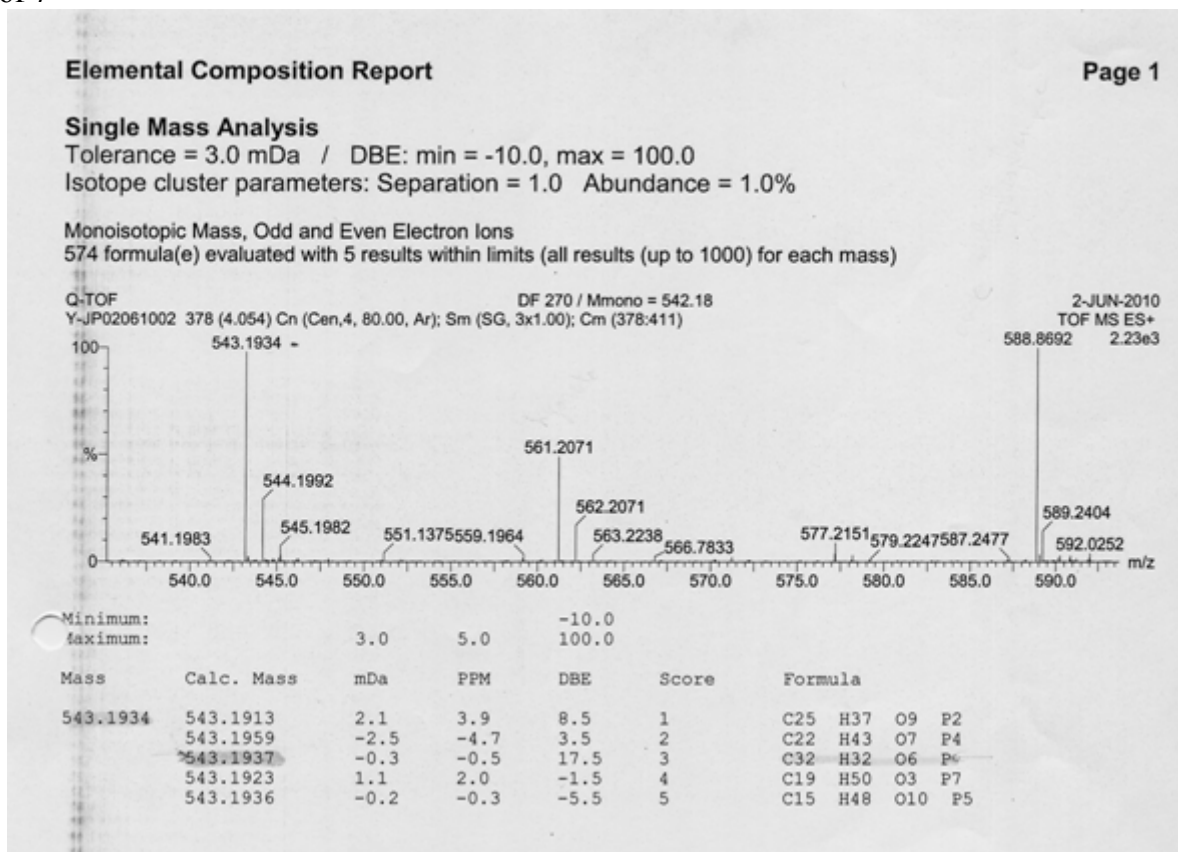

MS ES+ of 7

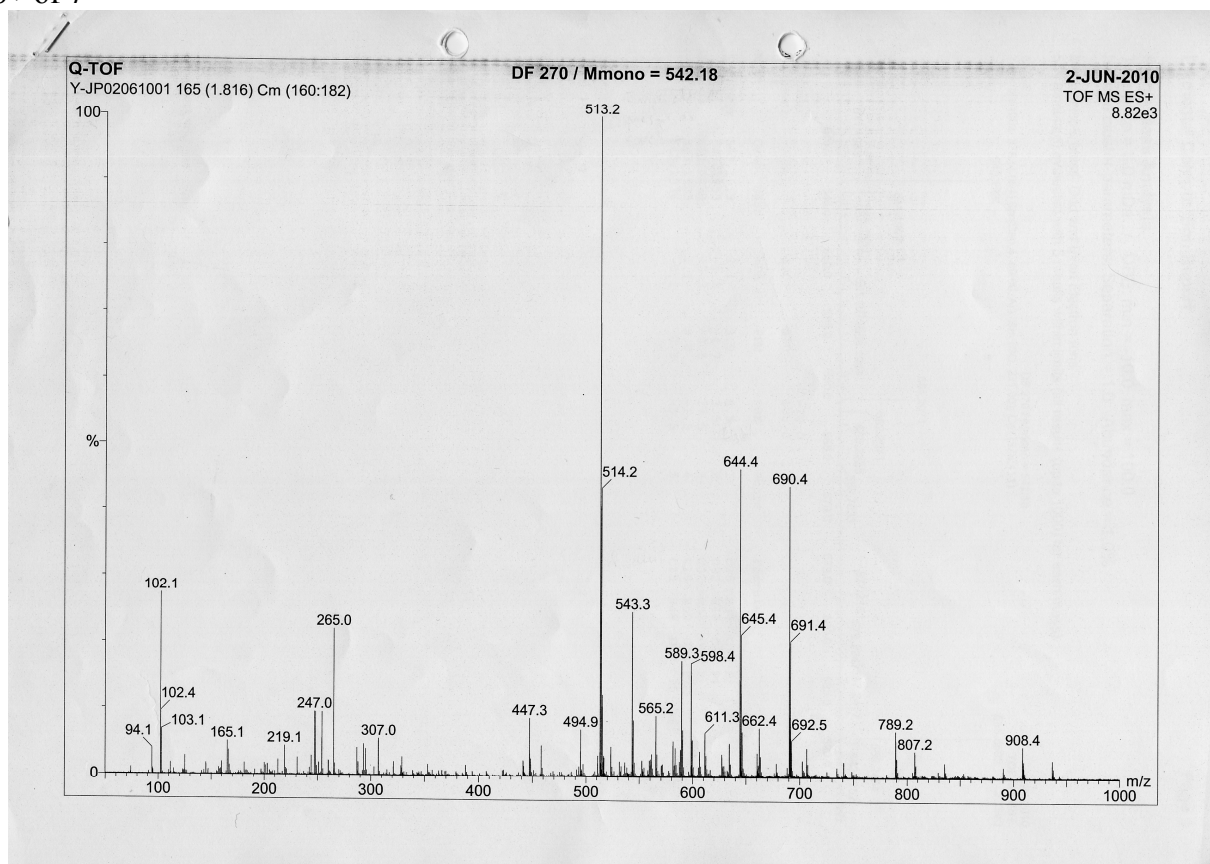





## Entry 2. NaBH<sub>4</sub>/(*S,S*)-tartaric acid

Sodium borohydride (56.2 mg, 1.48 mmol) was added to a solution of (*S,S*)-tartaric acid (0.222 g, 1.48 mmol) in THF (8 mL). The reaction mixture was stirred to reflux for 4 h. At -30 °C, a solution of  $\alpha$ -ketophosphinate (0.200 g, 0.37 mmol) in THF (2 mL) was added and the mixture was stirred for 24h at -30 °C. The solvent was evaporated and the residue remaining was diluted with ethyl acetate (15 mL). The organic solution was washed with an aqueous solution of hydrochloride (10 mL, 1M). The organic layer was dried over magnesium sulfate, filtered and concentrated under vacuum to give yellow oil.

<sup>31</sup>P NMR (161.97 MHz, CDCl<sub>3</sub>):  $\delta$  (ppm): 38.17 (s), 37.94 (s).

<sup>31</sup>P NMR spectrum of **3** and **4**: Table 1, entry 2. NaBH<sub>4</sub>/(*S,S*)-tartaric acid.

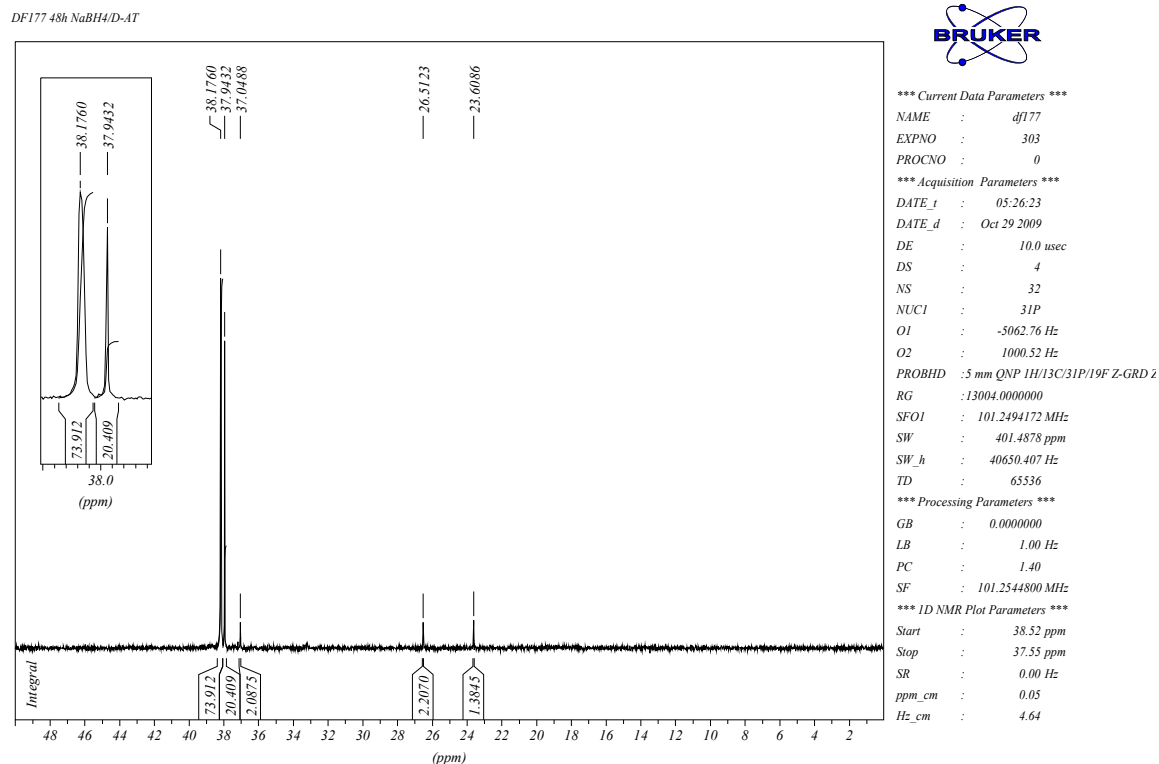

### Entry 3. NaBH<sub>4</sub>/(*R,R*)-tartaric acid

Sodium borohydride (56.2 mg, 1.48 mmol,) was added to a solution of (*R,R*)-tartaric acid (0.222 g, 1.48 mmol,) in THF (8 mL). The reaction mixture was stirred to reflux for 4 h. At - 30 °C, a solution of  $\alpha$ -ketophosphinate (0.200 g, 0.37 mmol,) in THF (2 mL) was added and the mixture was stirred for 24h at - 30 °C. The solvent was evaporated and the residue remaining was diluted with ethyl acetate (15 mL). The organic solution was washed with an aqueous solution of hydrochloride (10 mL, 1M). The organic layer was dried over magnesium sulfate, filtered and concentrated under vacuum to give yellow oil.

<sup>31</sup>P NMR (161.97 MHz, CDCl<sub>3</sub>):  $\delta$  (ppm): 37.38 (s), 36.46 (s).

<sup>31</sup>P NMR spectrum of **3** and **4**: Table 1, entry 3. NaBH<sub>4</sub>/(*R,R*)-tartaric acid.

DF18SP31CPD CDCl3 opt/tqspin cristau 8

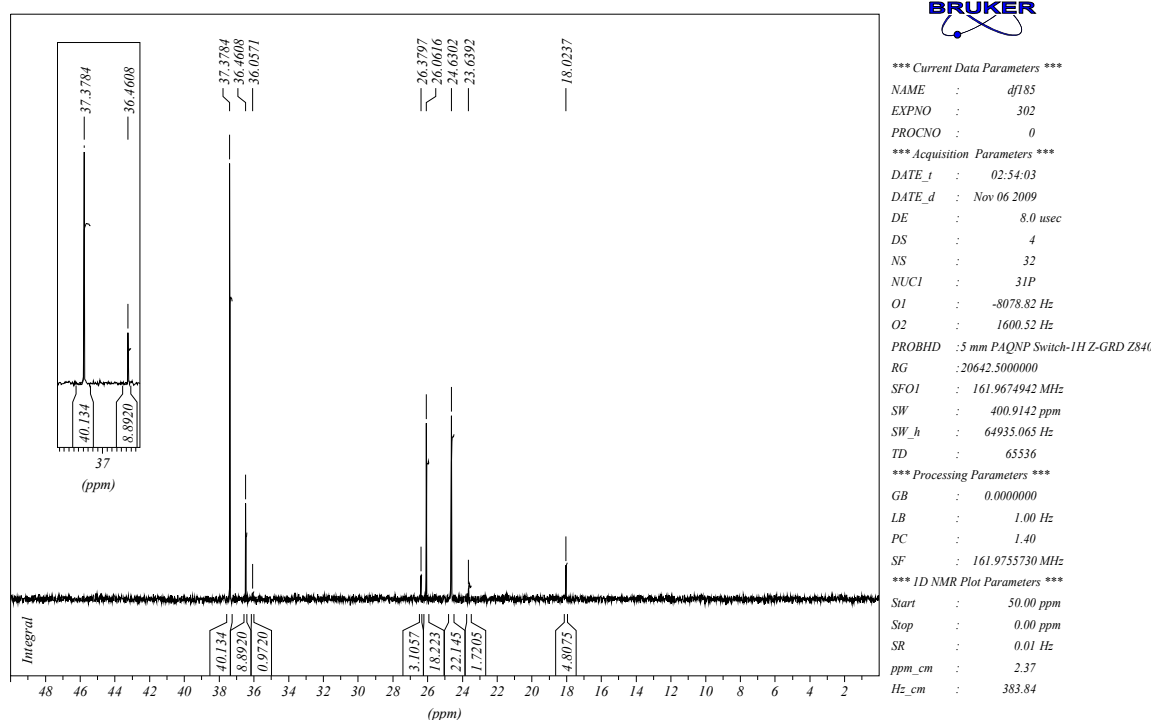

#### Entry 4. NaBH<sub>4</sub>/CeCl<sub>3</sub>·7 H<sub>2</sub>O

Sodium borohydride (8.2 mg, 0.22 mmol) was added to a solution of ketophosphinosugar (0.100 g, 0.18 mmol) and cerium (III) chloride heptahydrate (60.6 mg, 0.162 mmol) in THF (5 mL). The reaction mixture was stirred for 48h at room temperature, and then the solvent was evaporated. The residue remaining was diluted with dichloromethane (10 mL) and the organic solution was washed with an aqueous saturated solution of ammonium chloride (5 mL). The organic layer was dried over magnesium sulfate, filtrated and concentrated under vacuum to give yellow oil.

<sup>31</sup>P NMR (161.97 MHz, CDCl<sub>3</sub>): δ (ppm): 36.42 (s). Analytical HPLC (Column: Waters SunFire™ C18, 5μm, 4.6×250 mm; Eluent: acetonitrile/water (63:37); Flow: 1 mL·min<sup>-1</sup>): Retention time = 16.35 (95%), 19.02 (5%).

<sup>31</sup>P NMR spectrum of **3** and **4**: Table 1, entry 4. NaBH<sub>4</sub>/CeCl<sub>3</sub>·7H<sub>2</sub>O.

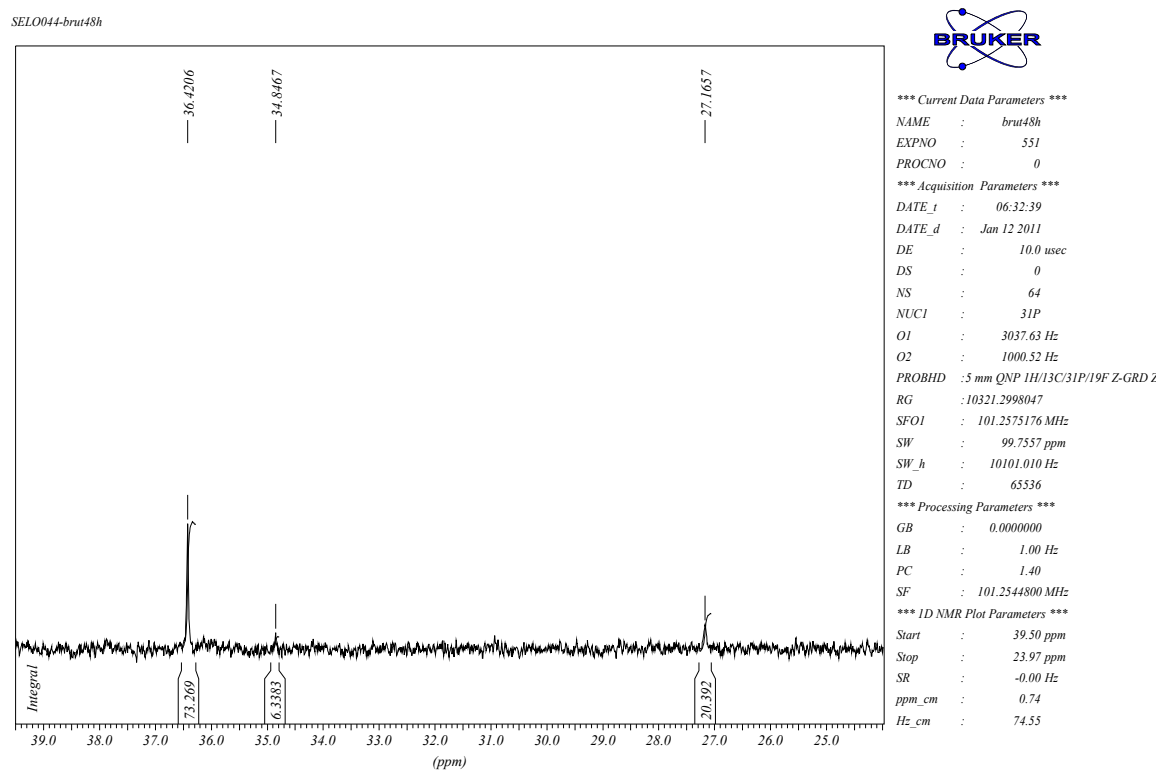

HPLC chromatogram of **3** and **4**: Table 1, entry 4. NaBH<sub>4</sub> / CeCl<sub>3</sub>·7 H<sub>2</sub>O

## ==== Shimadzu LCsolution Analysis Report ====

C:\...Data\Project1\SEVERINE\SELO044-BRUT48H-13012011.lcd  
 Acquired by : Admin  
 Sample Name : SELO044-BRUT48H-13012011  
 Sample ID : SELO044-BRUT48H-13012011  
 Tray# : 1  
 Vial # : 21  
 Injection Volume : 20 uL  
 Data File Name : SELO044-BRUT48H-13012011.lcd  
 Method File Name : isocratique 63-C- 25 min.lcm  
 Batch File Name : 13012011-SELO044-brut48h-63C-1.lcb  
 Report File Name : delphine report.lcr  
 Data Acquired : 13/01/2011 11:04:06  
 Data Processed : 15/02/2011 13:58:10

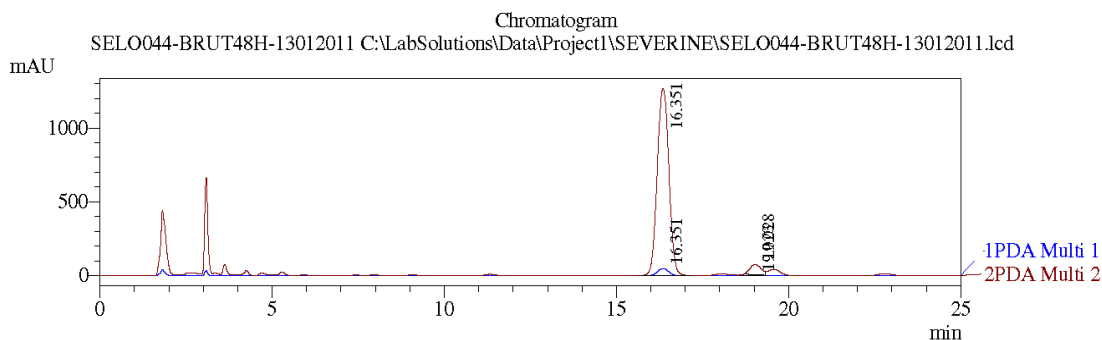

- 1 PDA Multi 1 / 254nm 4nm
- 2 PDA Multi 2 / 214nm 4nm

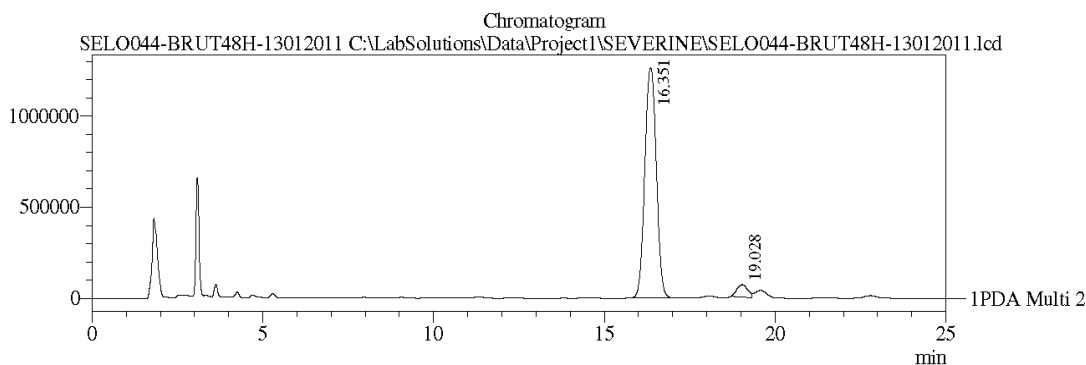

- 1 PDA Multi 2 / 214nm 4nm

PeakTable

PDA Ch2 214nm 4nm

| Pic   | Temps ret. | Hauteur | Aire     | Hauteur % | Aire %  |
|-------|------------|---------|----------|-----------|---------|
| 1     | 16.351     | 1262542 | 29487300 | 94.844    | 95.040  |
| 2     | 19.028     | 68637   | 1539025  | 5.156     | 4.960   |
| Total |            | 1331179 | 31026326 | 100.000   | 100.000 |

PeakTable

PDA Ch1 254nm 4nm

| Pic   | Temps rét. | Hauteur | Aire    | % Hauteur | Area %  |
|-------|------------|---------|---------|-----------|---------|
| 1     | 16.351     | 49378   | 1084069 | 95.320    | 95.140  |
| 2     | 19.023     | 2424    | 55379   | 4.680     | 4.860   |
| Total |            | 51802   | 1139448 | 100.000   | 100.000 |

Chromatogram

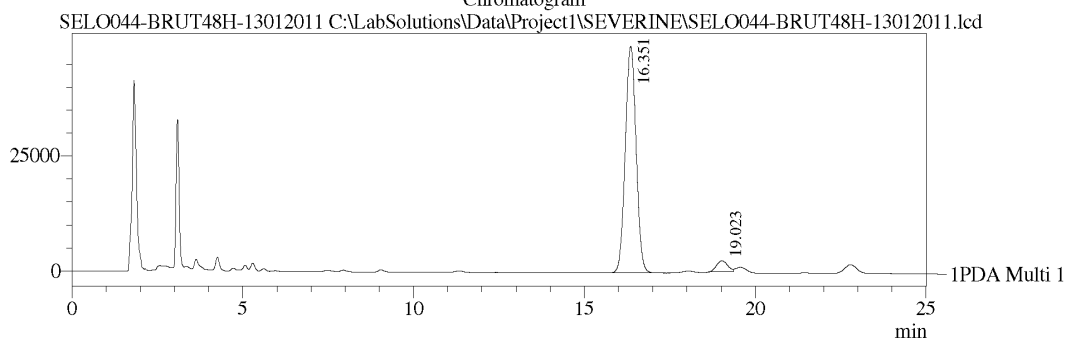

1 PDA Multi 1 / 254nm 4nm

Contour

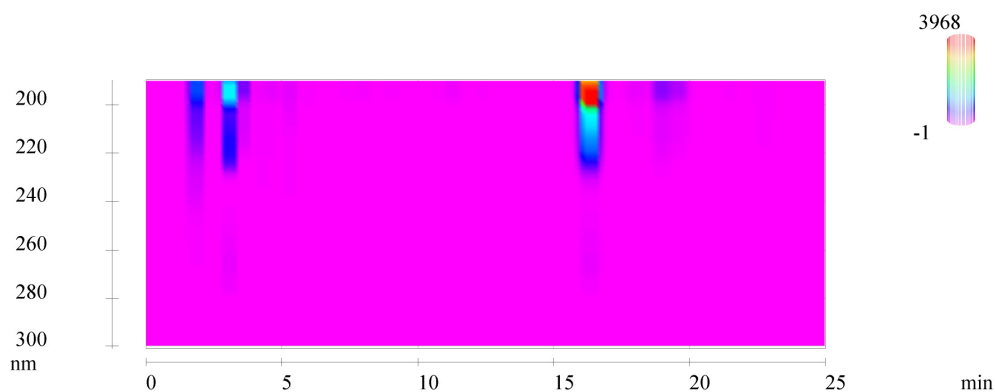

| <<LC Program>> |            | Method  |       |         |
|----------------|------------|---------|-------|---------|
| Time           | Unit       | Command | Value | Comment |
| 0.01           | Pumps      | C.Conc  | 63    |         |
| 0.01           | Pumps      | T.Flow  | 1     |         |
| 25.00          | Controller | Stop    |       |         |

### Entry 5. NaBH<sub>4</sub>/L-proline

Sodium borohydride (21.1 mg, 0.55 mmol) was added to a solution of L-proline (63.9 mg, 0.55 mmol,) in THF (4 mL). The reaction mixture was stirred at room temperature for 60 h, and then a solution of  $\alpha$ -ketophosphinate (0.200 g, 0.37 mmol) in THF (1.2 mL) was added. The mixture was stirred for 48 h at room temperature and solvent was evaporated. The residue remaining was diluted with dichloromethane (20 mL) and organic solution was washed with a saturated aqueous solution of ammonium chloride (10 mL). The organic layer was dried over magnesium sulfate, filtered and concentrated under vacuum to give yellow oil.

<sup>31</sup>P NMR (161.97 MHz, CDCl<sub>3</sub>):  $\delta$  (ppm): 36.42 (s)

<sup>31</sup>P NMR spectrum of **3** and **4**: Table 1, entry 5. NaBH<sub>4</sub>/L-proline.

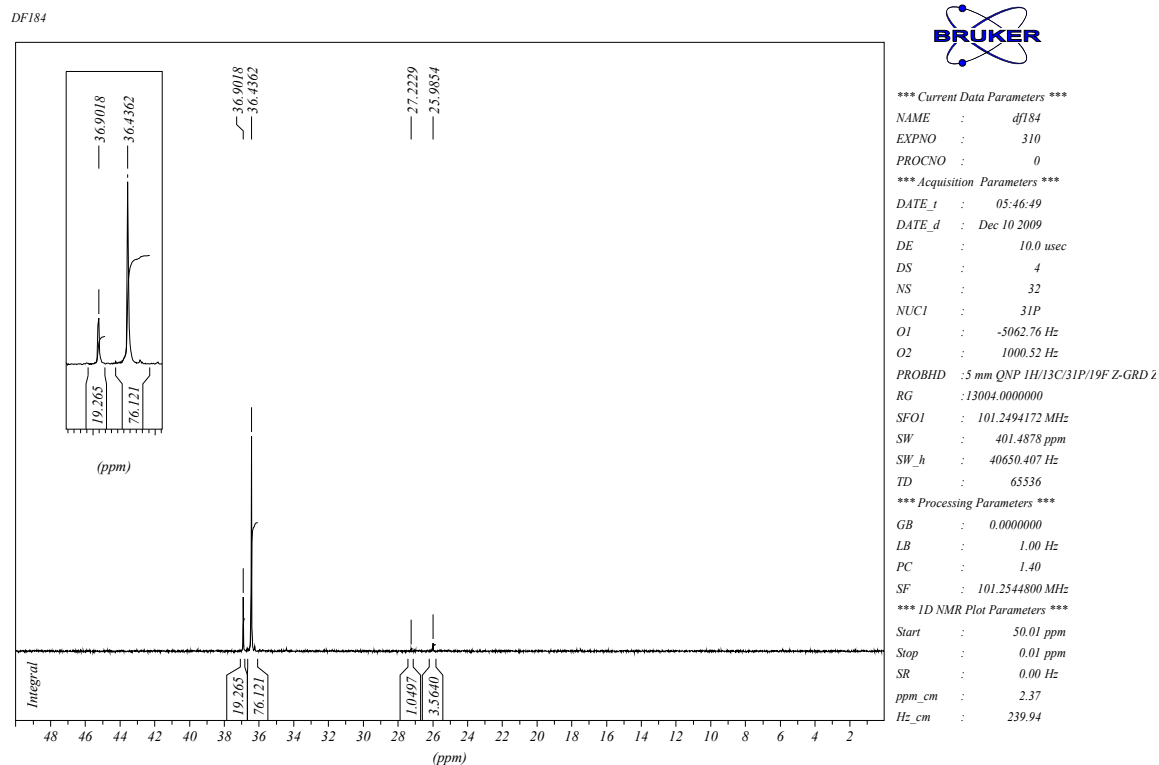

### Entry 6. NaBH<sub>4</sub>/*D*-proline

Sodium borohydride (0.55 mmol, 21.1 mg) was added to a solution of *D*-proline (63.9 mg, 0.55 mmol) in THF (4 mL). The reaction mixture was stirred at room temperature for 60 h, and then a solution of  $\alpha$ -ketophosphinate (0.37 mmol, 0.200 g) in THF (1.2 mL) was added. The reaction mixture was stirred for 48 h at room temperature and solvent was evaporated. The residue remaining was diluted with dichloromethane (20 mL) and organic solution was washed with a saturated aqueous solution of ammonium chloride solution (10 mL). The organic layer was dried over magnesium sulfate, filtered and concentrated under vacuum to give yellow oil.

<sup>31</sup>P NMR (161.97 MHz, CDCl<sub>3</sub>):  $\delta$  (ppm): 36.83 (s), 36.54 (s).

<sup>31</sup>P NMR spectrum of **3** and **4**: Table 1, entry 6. NaBH<sub>4</sub>/*D*-proline.

DF201P31CPD CDC13 opt/topspin cristau 5

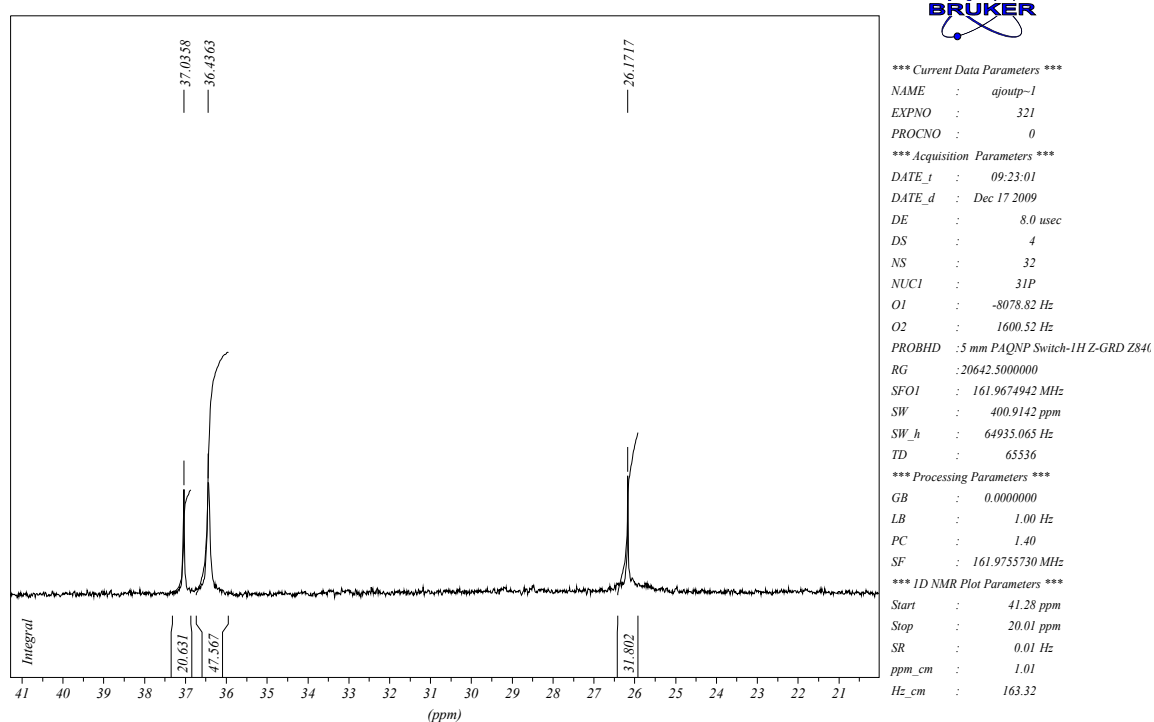



### Entry 7. NaBH<sub>4</sub>/L-proline/MgBr<sub>2</sub>

Sodium borohydride (20.0 mg, 0.525 mmol) was added to a solution of L-proline (60.4 mg, 0.525 mmol) in THF (4 mL). The reaction mixture was stirred at room temperature for 60 h, and then a solution of α-ketophosphinate (0.375 mmol, 0.203 g) and magnesium bromide ethyl etherate (0.375 mmol, 97.0 mg) in THF (1.2 mL) was added. The reaction mixture was stirred for 48 h at room temperature and solvent was evaporated. The residue remaining was diluted with dichloromethane (20 mL) and organic solution was washed with a saturated aqueous solution of ammonium chloride (10 mL). The organic layer was dried over magnesium sulfate, filtered and concentrated under vacuum to give yellow oil.

<sup>31</sup>P NMR (161.97 MHz, CDCl<sub>3</sub>): δ (ppm): 37.46 (s), 37.26 (s); Analytical HPLC (Column: Waters SunFire™, C18, 5 μm, 4.6×250 mm; Eluent: acetonitrile/water (63:37); Flow: 1 mL·min<sup>-1</sup>): Retention time = 16.68 (13%), 19.46 (87%).

<sup>31</sup>P NMR spectrum of **3** and **4**: Table 1, entry 7. NaBH<sub>4</sub>/L-proline/MgBr<sub>2</sub>

DF278 48hP31CPD

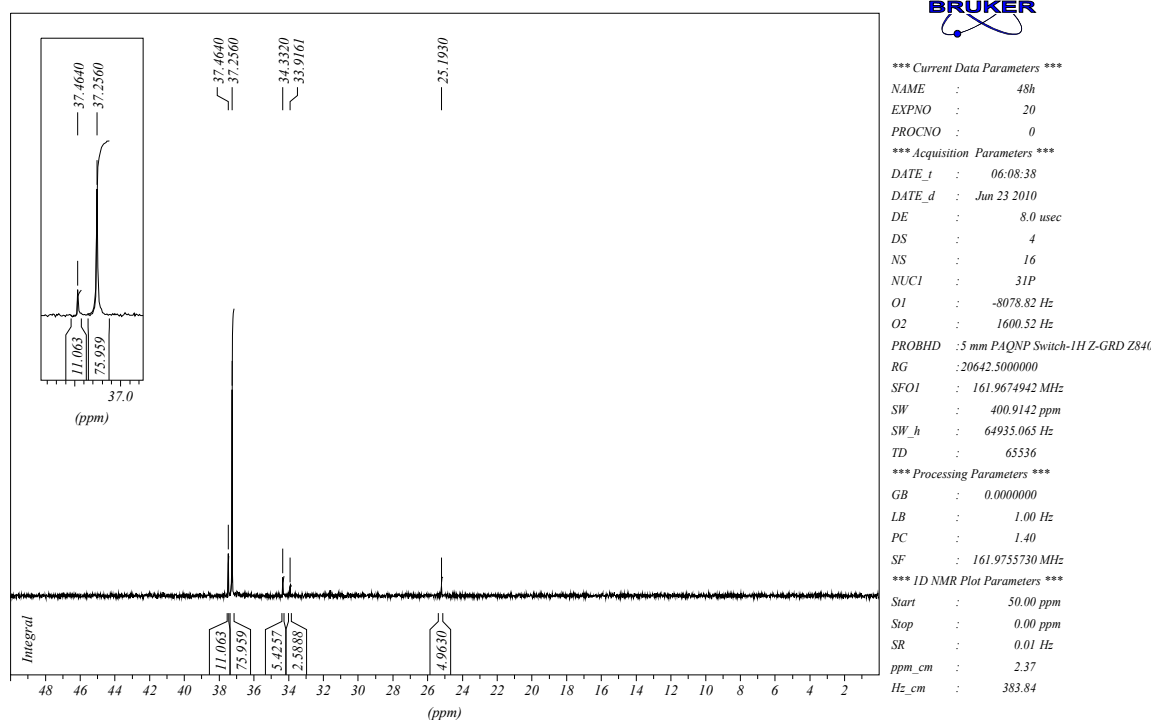

HPLC chromatogram of **3** and **4**: Table 1, entry 7. NaBH<sub>4</sub>/*L*-proline MgBr<sub>2</sub>

## ==== Shimadzu LCsolution Analysis Report ====

C:\...\Damien\Analyse reduction diaselect\DF278-63C-20100930-1.lcd  
Acquired by : Admin  
Sample Name : DF278-63C-20100930  
Sample ID : DF278-63C-20100930  
Tray# : 1  
Vial # : 46  
Injection Volume : 20 uL  
Data File Name : DF278-63C-20100930-1.lcd  
Method File Name : isocratique 63-C- 30 min.lcm  
Batch File Name : 30092010-Analyses dia278-279-1.lcb  
Report File Name : delphine report.lcr  
Data Acquired : 30/09/2010 14:48:53  
Data Processed : 15/02/2011 14:08:56

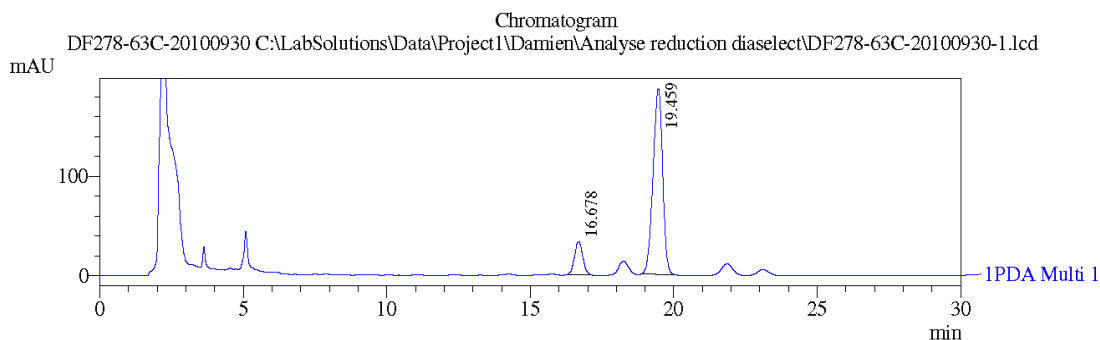

1 PDA Multi 1 / 254nm 4nm

Chromatogram  
DF278-63C-20100930 C:\LabSolutions\Data\Project1\Damien\Analyse reduction diaselect\DF278-63C-20100930-1.lcd

PDA Ch2

PeakTable

C:\LabSolutions\Data\Project1\Damien\Analyse reduction diaselect\DF278-63C-20100930-1.lcd

PeakTable

PDA Ch1 254nm 4nm

| Pic   | Temps rét. | Hauteur | Aire    | % Hauteur | Area %  |
|-------|------------|---------|---------|-----------|---------|
| 1     | 16.678     | 33304   | 651184  | 15.144    | 13.050  |
| 2     | 19.459     | 186609  | 4338793 | 84.856    | 86.950  |
| Total |            | 219912  | 4989977 | 100.000   | 100.000 |

Chromatogram

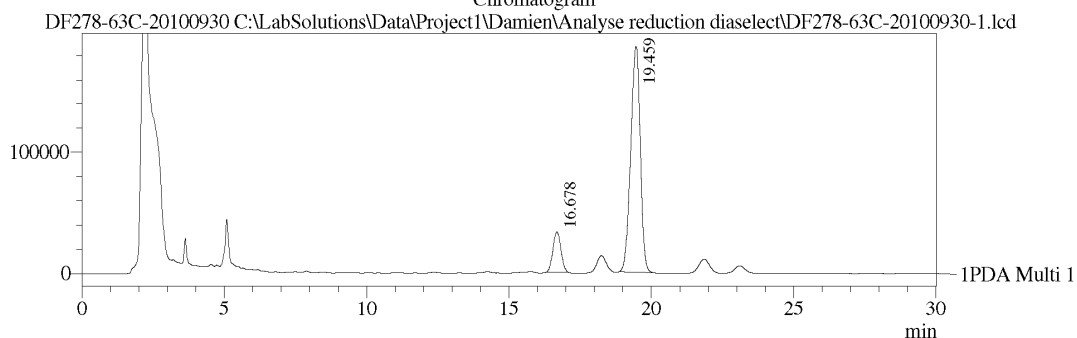

Contour

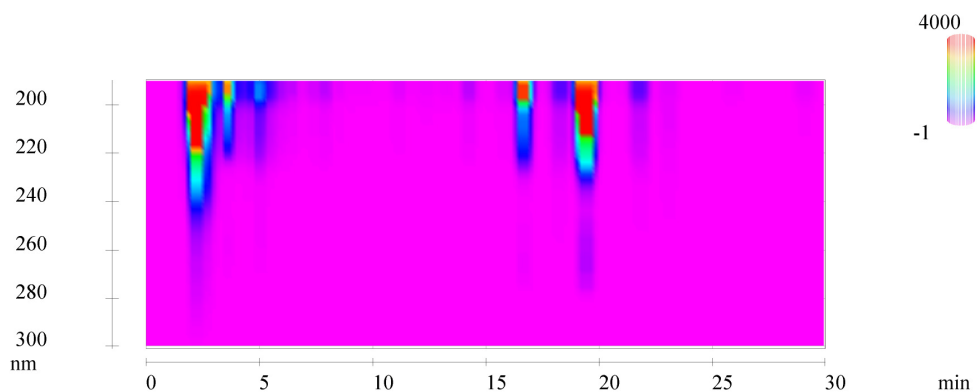

| <<LC Program>> |            | Method  |       |         |
|----------------|------------|---------|-------|---------|
| Time           | Unit       | Command | Value | Comment |
| 0.01           | Pumps      | C.Conc  | 63    |         |
| 0.01           | Pumps      | T.Flow  | 1     |         |
| 30.00          | Controller | Stop    |       |         |

C:\LabSolutions\Data\Project1\Damien\Analyse reduction diaselect\DF278-63C-20100930-1.lcd

### Entry 8. NaBH<sub>4</sub>/L-proline/LiClO<sub>4</sub>

Sodium borohydride (20.0 mg, 0.525 mmol) was added to a solution of L-proline (60.4 mg, 0.525 mmol) in THF (4 mL). The reaction mixture was stirred at room temperature for 60 h, and then a solution of  $\alpha$ -ketophosphinate (0.203 g, 0.375 mmol) and lithium perchlorate (0.375 mmol, 40 mg) in THF (1.2 mL) was added. The reaction mixture was stirred for 48 h at room temperature and solvent was evaporated. The residue remaining was diluted with dichloromethane (20 mL) and organic solution was washed with a saturated aqueous solution of ammonium chloride (10 mL). The organic layer was dried over magnesium sulfate, filtered and concentrated under vacuum to give yellow oil.

<sup>31</sup>P NMR (161.97 MHz, CDCl<sub>3</sub>):  $\delta$  (ppm): 36.86 (s), 36.26 (s); Analytical HPLC (Column: Waters SunFire™ C18, 5  $\mu$ m, 4.6 $\times$ 250 mm; Eluent: acetonitrile/water (63:37); Flow: 1 mL.min<sup>-1</sup>): Retention time = 15.92 (12%), 18.48 (88%).

<sup>31</sup>P NMR spectrum of **3** and **4**: Table 1, entry 8. NaBH<sub>4</sub>/L-proline/LiClO<sub>4</sub>

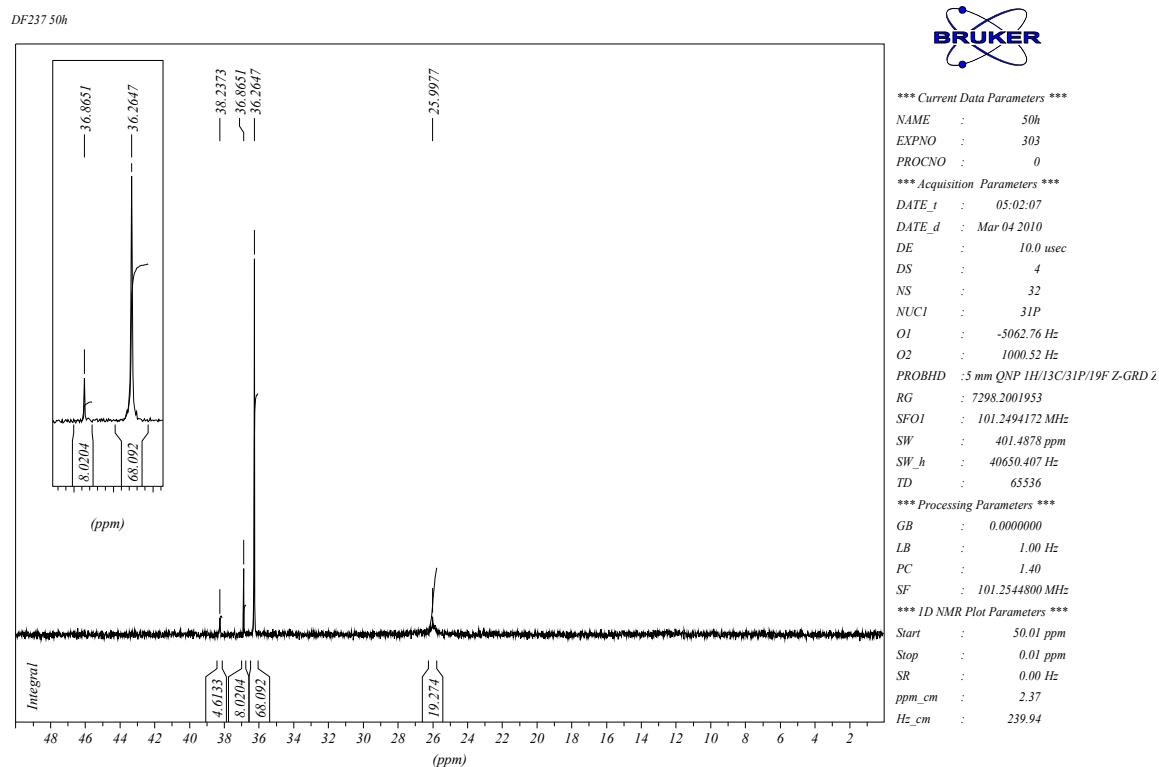

HPLC chromatogram of **3** and **4**: Table 1, entry 8. NaBH<sub>4</sub>/*L*-proline/LiClO<sub>4</sub>

## ==== Shimadzu LCsolution Analysis Report ====

C:\...\Damien\Synthese diaselect\DF237\_isocratique 63-C- 20 min.lcd  
 Acquired by : Admin  
 Sample Name : DF237  
 Sample ID :  
 Tray# : 1  
 Vail # : 58  
 Injection Volume : 20 uL  
 Data File Name : DF237\_isocratique 63-C- 20 min.lcd  
 Method File Name : isocratique 63-C- 20 min.lcm  
 Batch File Name : Synthese diastereoselective Batch1.lcb  
 Report File Name : Default.lcr  
 Data Acquired : 18/05/2010 16:47:00  
 Data Processed : 18/05/2010 17:53:37

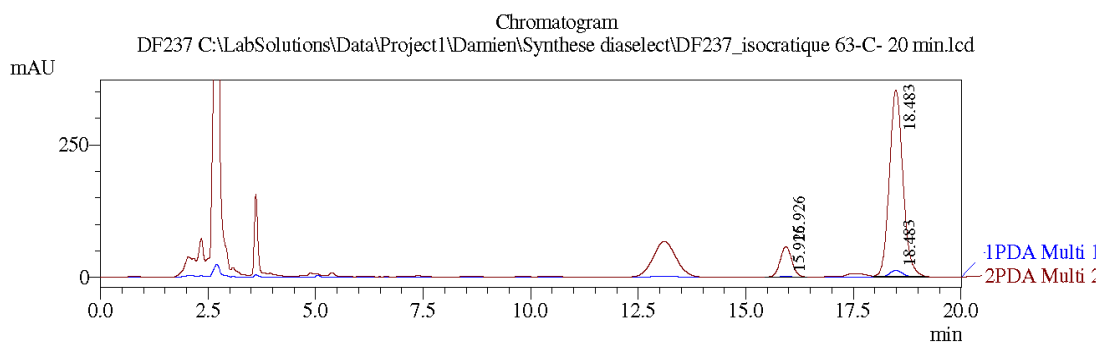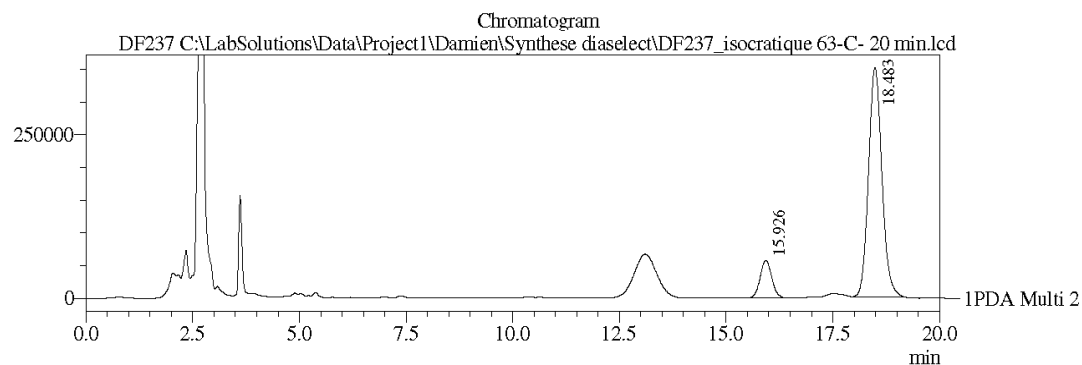

PeakTable

PDA Ch2 214nm 4nm

| Pic   | Temps ret. | Hauteur | Aire    | Hauteur % | Aire %  |
|-------|------------|---------|---------|-----------|---------|
| 1     | 15.926     | 57440   | 1076651 | 14.104    | 12.379  |
| 2     | 18.483     | 349813  | 7620754 | 85.896    | 87.621  |
| Total |            | 407253  | 8697405 | 100.000   | 100.000 |

PeakTable

PDA Ch1 254nm 4nm

| Pic   | Temps rét. | Hauteur | Aire   | % Hauteur | Area %  |
|-------|------------|---------|--------|-----------|---------|
| 1     | 15.926     | 2007    | 37081  | 13.553    | 11.587  |
| 2     | 18.483     | 12804   | 282951 | 86.447    | 88.413  |
| Total |            | 14811   | 320032 | 100.000   | 100.000 |

Chromatogram

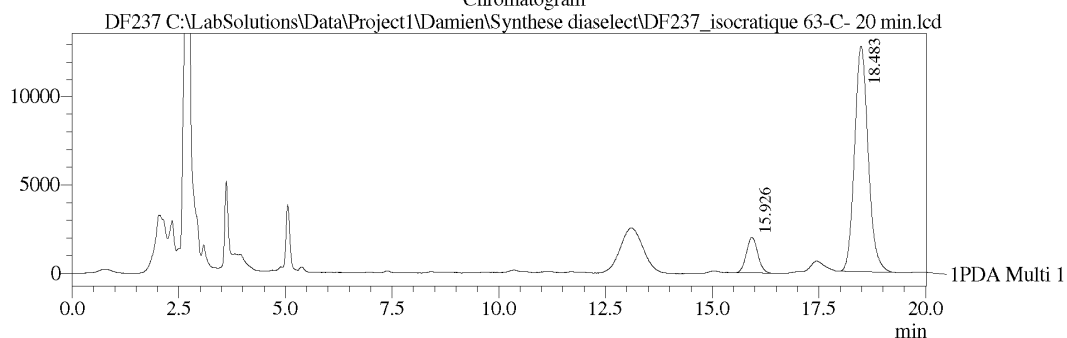

Contour

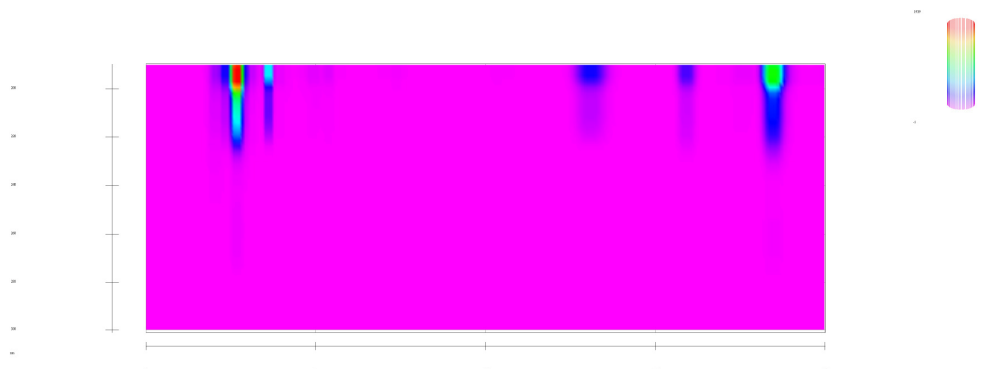

| <<LC Program>> | Unit       | Method  | Value | Comment |
|----------------|------------|---------|-------|---------|
| Time           | Pumps      | Command | 63    |         |
| 0.01           | Pumps      | T.Flow  | 1     |         |
| 0.01           | Controller | Stop    |       |         |
| 20.00          |            |         |       |         |

C:\LabSolutions\Data\Project1\Damien\Synthese diaselect\DF237\_isocratique 63-C- 20 min.lcd

**Entry 9. NaBH<sub>4</sub>/L-proline/ZnCl<sub>2</sub>**



Sodium borohydride (20.0 mg, 0.525 mmol) was added to a solution of *L*-proline (60.4 mg, 0.525 mmol) in THF (4 mL). The reaction mixture was stirred at room temperature for 60 h, and then a solution of  $\alpha$ -ketophosphate (0.375 mmol, 0.203 g) and zinc chloride (0.375 mmol, 51 mg) in THF (1.2 mL) was added. The reaction mixture was stirred for 48 h at room temperature and solvent was evaporated. The residue remaining was diluted with dichloromethane (20 mL) and organic solution was washed with a saturated aqueous solution of ammonium chloride (10 mL). The organic layer was dried over magnesium sulfate, filtered and concentrated under vacuum to give yellow oil.

$^{31}\text{P}$  NMR (161.97 MHz,  $\text{CDCl}_3$ ):  $\delta$  (ppm): 36.80 (s), 36.19 (s); Analytical HPLC (Column: Waters SunFire<sup>TM</sup> C18, 5  $\mu\text{m}$ , 4.6 $\times$ 250 mm; Eluent: acetonitrile/water (63:37); Flow: 1 mL.min<sup>-1</sup>): Retention time = 15.91 (12%), 18.47 (88%).

$^{31}\text{P}$  NMR spectrum of **3** and **4**: Table 1, entry 9.  $\text{NaBH}_4$ /*L*-proline/ $\text{ZnCl}_2$

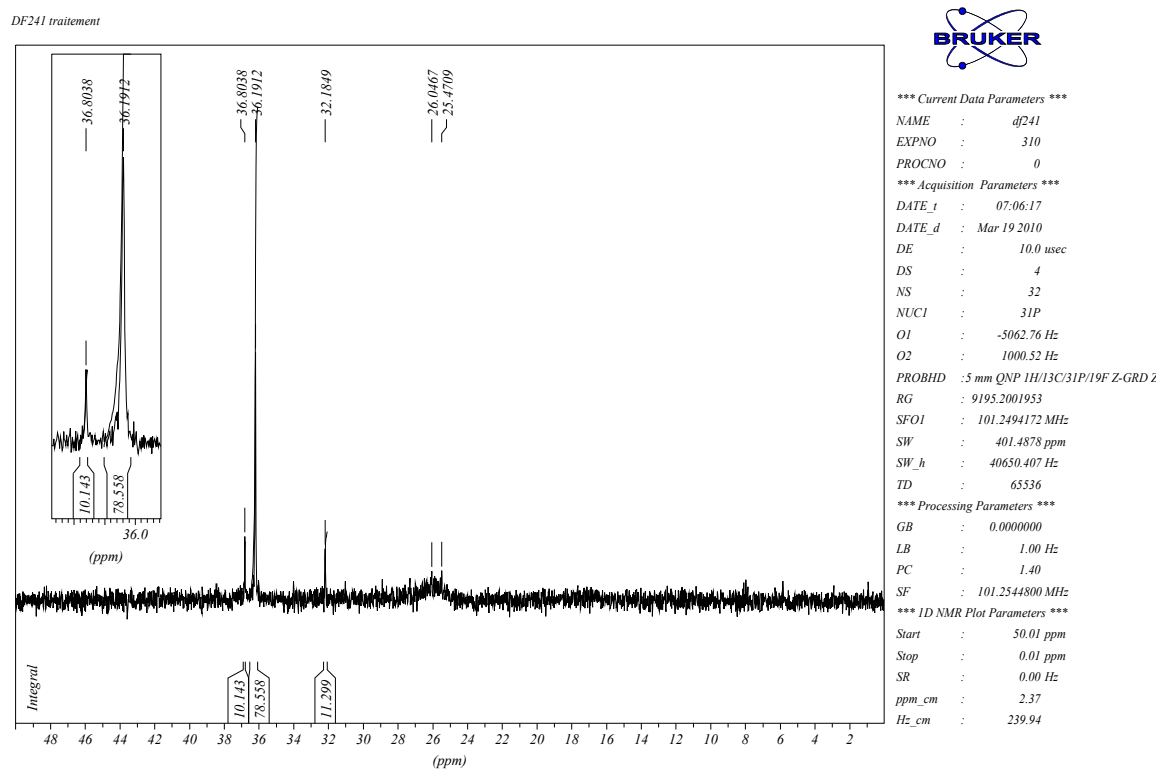

HPLC chromatogram of **3** and **4**: Table 1, entry 9. NaBH<sub>4</sub>/*L*-proline/ZnCl<sub>2</sub>

### ==== Shimadzu LCsolution Analysis Report ====

C:\...\Damien\Synthese diaselect\DF241\_isocratique 63-C- 20 min.lcd  
 Acquired by : Admin  
 Sample Name : DF241  
 Sample ID :  
 Tray# : 1  
 Vail # : 57  
 Injection Volume : 20 uL  
 Data File Name : DF241\_isocratique 63-C- 20 min.lcd  
 Method File Name : isocratique 63-C- 20 min.lcm  
 Batch File Name : Synthese diastereoselective Batch1.lcb  
 Report File Name : Default.lcr  
 Data Acquired : 18/05/2010 16:26:32  
 Data Processed : 18/05/2010 17:51:05

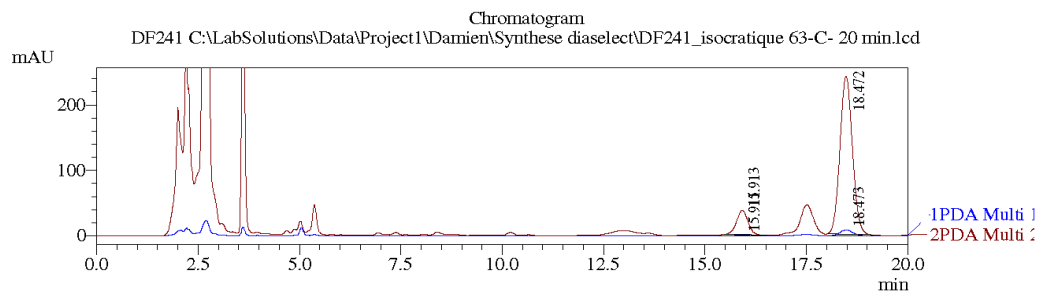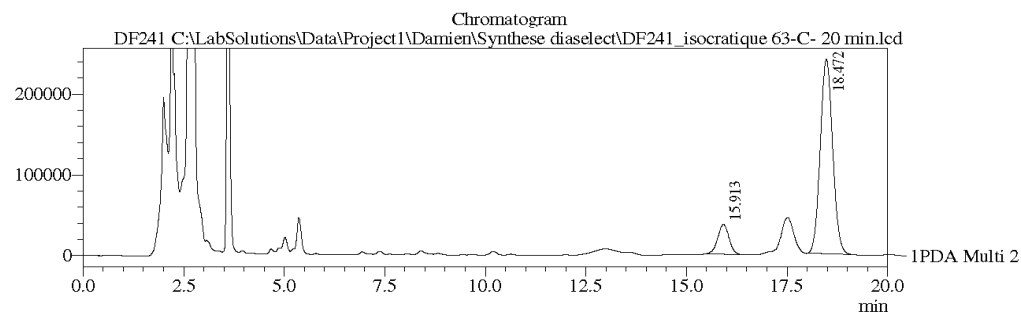

PeakTable

| PDA Ch2 214nm 4nm |            |         |         |           |         |
|-------------------|------------|---------|---------|-----------|---------|
| Pic               | Temps ret. | Hauteur | Aire    | Hauteur % | Aire %  |
| 1                 | 15.913     | 37023   | 714353  | 13.326    | 12.208  |
| 2                 | 18.472     | 240794  | 5137198 | 86.674    | 87.792  |
| Total             |            | 277816  | 5851552 | 100.000   | 100.000 |

C:\LabSolutions\Data\Project1\Damien\Synthese diaselect\DF241\_isocratique 63-C- 20 min.lcd

PeakTable

PDA Ch1 254nm 4nm

| Pic   | Temps rét. | Hauteur | Aire   | % Hauteur | Area %  |
|-------|------------|---------|--------|-----------|---------|
| 1     | 15.911     | 1309    | 25945  | 12.889    | 11.873  |
| 2     | 18.473     | 8850    | 192579 | 87.111    | 88.127  |
| Total |            | 10160   | 218523 | 100.000   | 100.000 |

Chromatogram

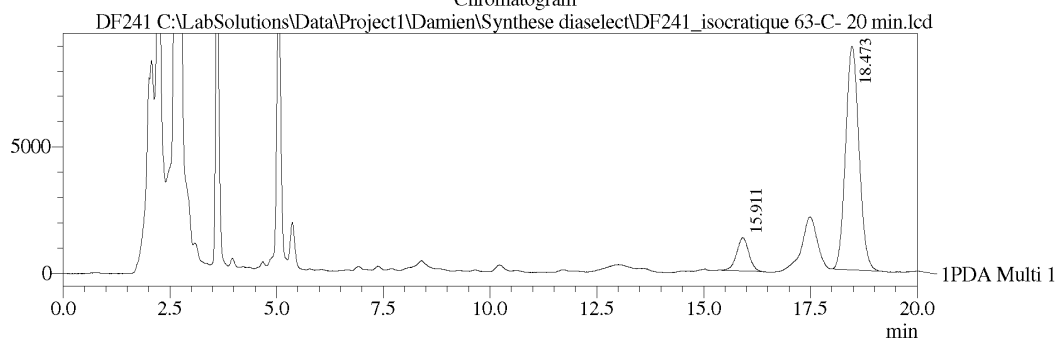

1 PDA Multi 1 / 254nm 4nm

Contour

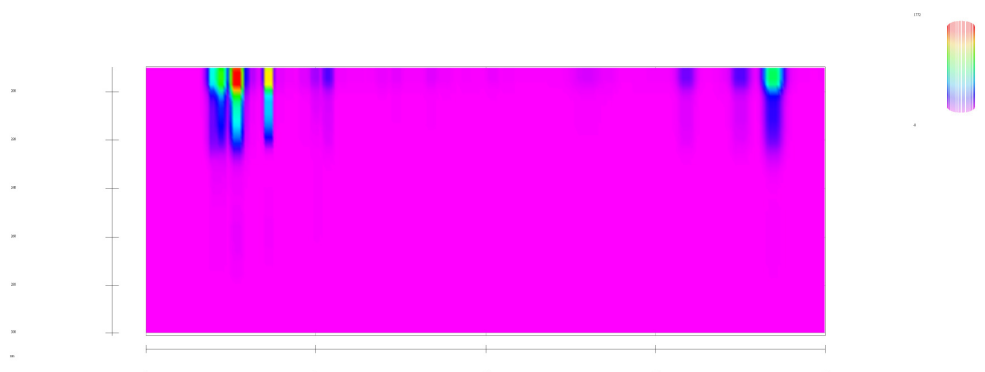

| <<LC Program>> | Unit       | Method | Value | Comment |
|----------------|------------|--------|-------|---------|
| Time           | Pumps      | C.Conc | 63    |         |
| 0.01           | Pumps      | T.Flow | 1     |         |
| 20.00          | Controller | Stop   |       |         |

C:\LabSolutions\Data\Project1\Damien\Synthese diaselect\DF241\_isocratique 63-C- 20 min.lcd

### Entry 10. NaBH<sub>4</sub>/L-proline/CeCl<sub>3</sub>·7 H<sub>2</sub>O

Sodium borohydride (20.0 mg, 0.525 mmol) was added to a solution of L-proline (60.4 mg, 0.525 mmol) in THF (4 mL). The reaction mixture was stirred at room temperature for 60 h, and then a solution of α-ketophosphinate (0.375 mmol, 0.203 g) and cerium (III) chloride heptahydrate (0.375 mmol, 140 mg) in THF (1.2 mL) was added. The mixture was stirred for 48 h at room temperature and solvent was evaporated. The residue remaining was diluted with dichloromethane (20 mL) and organic solution was washed with a saturated aqueous solution of ammonium chloride (10 mL). The organic layer was dried over magnesium sulfate, filtrated and concentrated under vacuum to give yellow oil.

<sup>31</sup>P NMR (161.97 MHz, DMSO-d<sub>6</sub>): δ (ppm): 38.79 (s), 35.85 (s); Analytical HPLC (Column: Waters SunFire™ C18, 5 μm 4.6×250 mm, Eluent: acetonitrile/water (63:37); Flow: 1 mL·min<sup>-1</sup>): Retention time = 16.26 (7%), 18.96 (93%).

<sup>31</sup>P NMR spectrum of **3** and **4**: Table 1, entry 10. NaBH<sub>4</sub>/L-proline/CeCl<sub>3</sub>·7 H<sub>2</sub>O

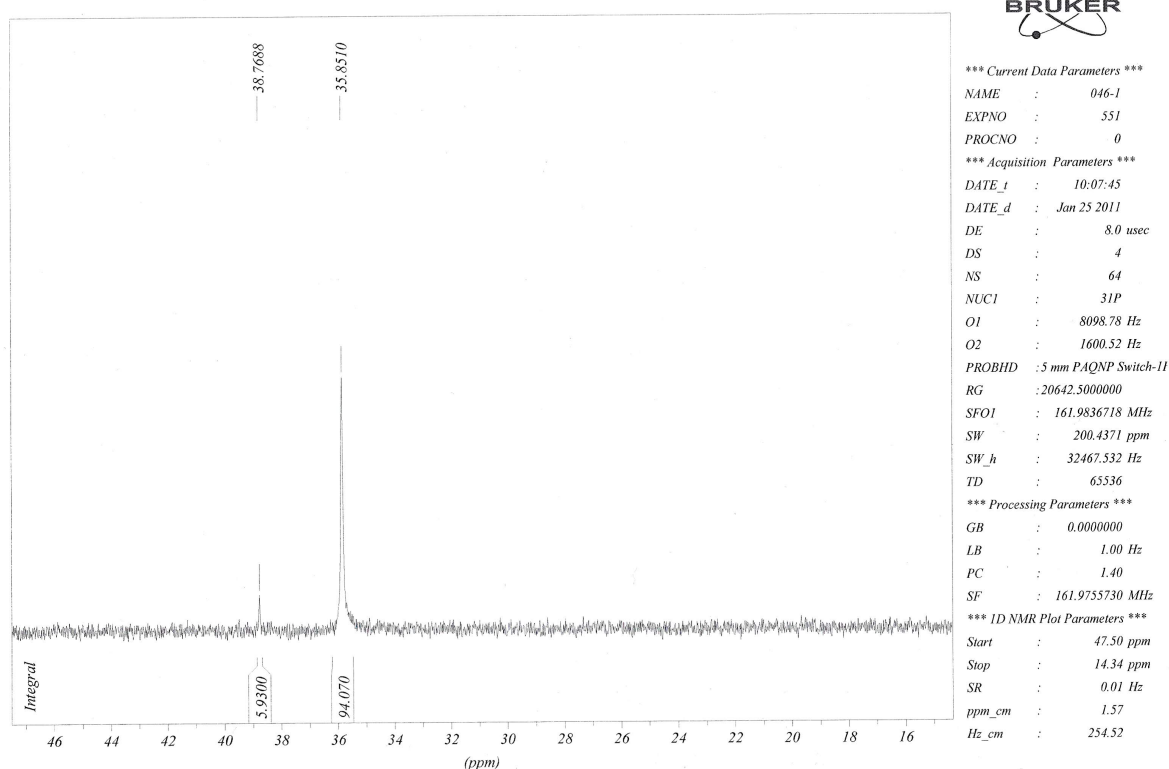

HPLC chromatogram of **3** and **4**: Table 1, entry 10. NaBH<sub>4</sub>/*L*-proline/CeCl<sub>3</sub>·7 H<sub>2</sub>O

## ==== Shimadzu LCsolution Analysis Report ====

C:\...Data\Project1\SEVERINE\SELO046-BRUT48H-20012011-1.lcd  
 Acquired by : Admin  
 Sample Name : selo046-brut48h-20012011-1  
 Sample ID : selo046-brut48h-20012011-1  
 Tray# : 1  
 Vail # : 24  
 Injection Volume : 20 uL  
 Data File Name : SELO046-BRUT48H-20012011-1.lcd  
 Method File Name : isocratique 63-C- 25 min.lcm  
 Batch File Name : 20012011-SELO046-brut48h-63C-1.lcb  
 Report File Name : delphine report.lcr  
 Data Acquired : 20/01/2011 14:47:59  
 Data Processed : 20/01/2011 15:34:01

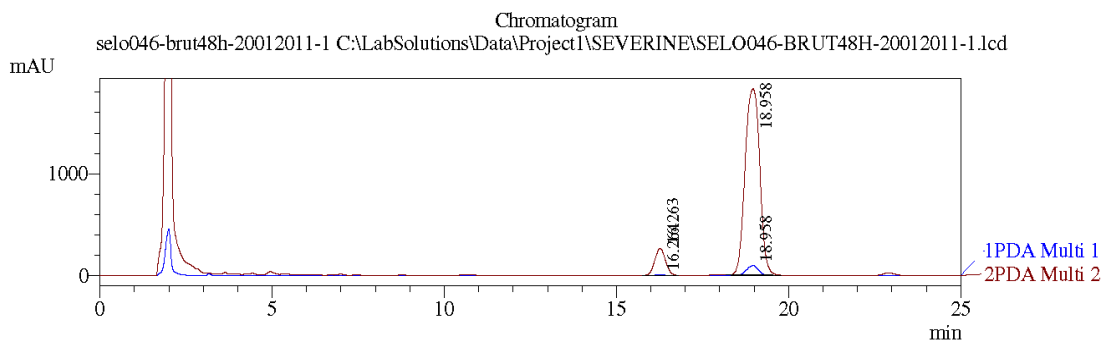

- 1 PDA Multi 1 / 254nm 4nm
- 2 PDA Multi 2 / 214nm 4nm

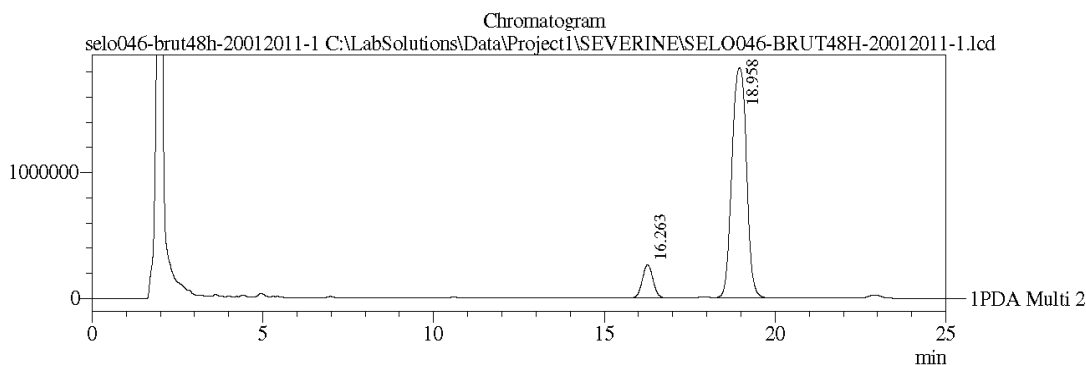

- 1 PDA Multi 2 / 214nm 4nm

PeakTable

PDA Ch2 214nm 4nm

| Pic   | Temps ret. | Hauteur | Aire     | Hauteur % | Aire %  |
|-------|------------|---------|----------|-----------|---------|
| 1     | 16.263     | 263436  | 565557   | 12.603    | 9.476   |
| 2     | 18.958     | 1826784 | 54029712 | 87.397    | 90.524  |
| Total |            | 2090220 | 59685269 | 100.000   | 100.000 |

PeakTable

PDA Ch1 254nm 4nm

| Pic   | Temps rét. | Hauteur | Aire    | % Hauteur | Area %  |
|-------|------------|---------|---------|-----------|---------|
| 1     | 16.264     | 9040    | 194293  | 8.418     | 7.416   |
| 2     | 18.958     | 98351   | 2425708 | 91.582    | 92.584  |
| Total |            | 107391  | 2620000 | 100.000   | 100.000 |

Chromatogram

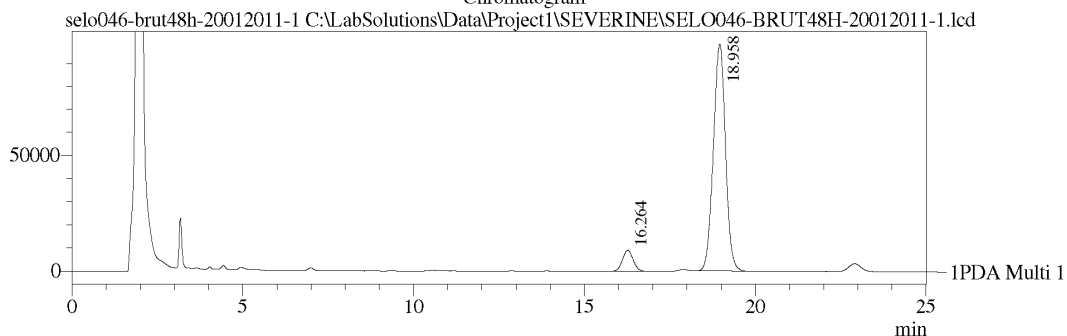

1 PDA Multi 1 / 254nm 4nm

Contour

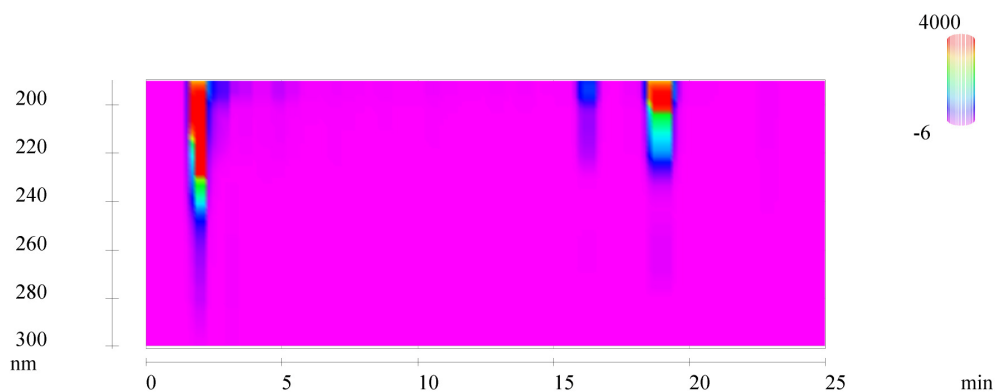

| <<LC Program>> |            | Method  |       |         |
|----------------|------------|---------|-------|---------|
| Time           | Unit       | Command | Value | Comment |
| 0.01           | Pumps      | C.Conc  | 63    |         |
| 0.01           | Pumps      | T.Flow  | 1     |         |
| 25.00          | Controller | Stop    |       |         |

C:\LabSolutions\Data\Project1\SEVERINE\SELO046-BRUT48H-20012011-1.lcd



### Entry 11. NaBH<sub>4</sub>/D-proline/CeCl<sub>3</sub>·7 H<sub>2</sub>O

Sodium borohydride (20.0 mg, 0.525 mmol) was added to a solution of D-proline (60.4 mg, 0.525 mmol) in THF (4 mL). The reaction mixture was stirred at room temperature for 60 h, and then a solution of α-ketophosphinate (0.375 mmol, 0.203 g) and cerium (III) chloride heptahydrate (0.375 mmol, 140 mg) in THF (1.2 mL) was added. The mixture was stirred for 48 h at room temperature and solvent was evaporated. The residue remaining was diluted with dichloromethane (20 mL) and organic solution was washed with a saturated aqueous solution of ammonium chloride (10 mL). The organic layer was dried over magnesium sulfate, filtrated and concentrated under vacuum to give yellow oil.

<sup>31</sup>P NMR (161.97 MHz, DMSO-d<sub>6</sub>): δ (ppm): 38.77 (s), 35.84 (s); Analytical HPLC (Column: Waters SunFire™ C18, 5 μm 4.6×250 mm, Eluent: acetonitrile/water (63:37); Flow: 1 mL·min<sup>-1</sup>): Retention time = 16.26 (7%), 18.96 (93%).

<sup>31</sup>P NMR spectrum of **3** and **4**: Table 1, entry 11. NaBH<sub>4</sub>/D-proline/CeCl<sub>3</sub>·7 H<sub>2</sub>O

SELO-059-2-DMSO-P31CPDP31CPD DMSO opt/topspin am2n1 4

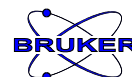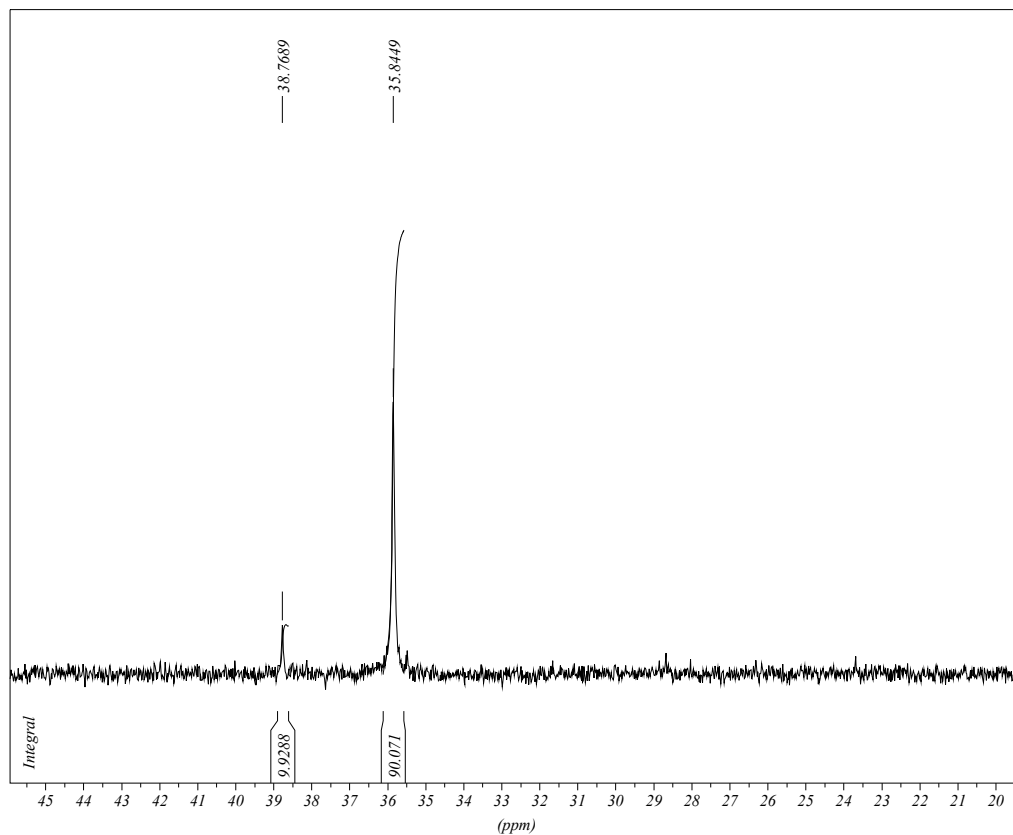

\*\*\* Current Data Parameters \*\*\*

NAME : 059-2  
EXPNO : 553  
PROCNO : 0

\*\*\* Acquisition Parameters \*\*\*

DATE\_t : 05:00:31  
DATE\_d : Nov 18 2011  
DE : 8.0 usec  
DS : 4  
NS : 16  
NUC1 : 31P  
O1 : 8098.78 Hz  
O2 : 1600.52 Hz  
PROBHD : 5 mm PABBO BB/19F-1H/D Z-GRD Z  
RG : 20642.5000000  
SFO1 : 161.9836718 MHz  
SW : 400.8741 ppm  
SW\_h : 64935.065 Hz  
TD : 65536

\*\*\* Processing Parameters \*\*\*

GB : 0.0000000  
LB : 1.00 Hz  
PC : 1.40  
SF : 161.9755730 MHz

\*\*\* 1D NMR Plot Parameters \*\*\*

Start : 45.94 ppm  
Stop : 19.27 ppm  
SR : -0.00 Hz  
ppm\_cm : 1.26  
Hz\_cm : 204.74

## ==== Shimadzu LCsolution Analysis Report ====

C:\LabSolutions\Data\Project1\SEVERINE\SELO059-18112011-1.lcd  
 Acquired by : Admin  
 Sample Name : selo059-18112011-1  
 Sample ID : selo059-18112011-1  
 Tray# : 1  
 Vail # : 18  
 Injection Volume : 20 uL  
 Data File Name : SELO059-18112011-1.lcd  
 Method File Name : isocratique 63-C- 25 min.lcm  
 Batch File Name : 18112011-SELO059-48h-63C-1.lcb  
 Report File Name : delphine report.lcr  
 Data Acquired : 18/11/2011 15:35:12  
 Data Processed : 18/11/2011 16:03:25

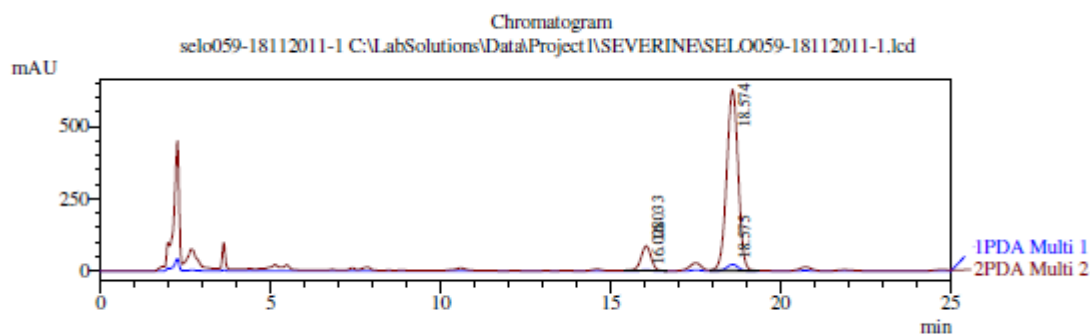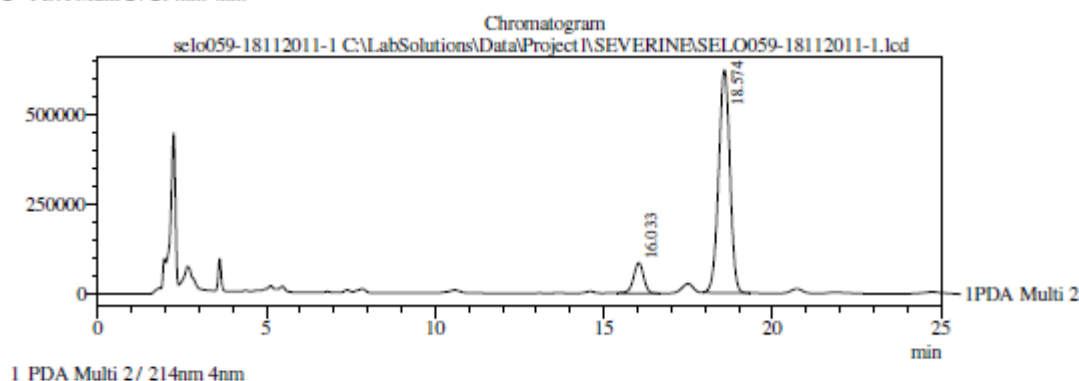

PeakTable

| PDA Ch2 214nm 4nm |            |         |          |           |         |
|-------------------|------------|---------|----------|-----------|---------|
| Pic               | Temps ret. | Hauteur | Aire     | Hauteur % | Aire %  |
| 1                 | 16.033     | 84940   | 1745518  | 11.982    | 10.722  |
| 2                 | 18.574     | 623984  | 14534831 | 88.018    | 89.278  |
| Total             |            | 708924  | 16280349 | 100.000   | 100.000 |

PeakTable

PDA Ch1 254nm 4nm

| Pic   | Temps rét. | Hauteur | Aire   | % Hauteur | Area %  |
|-------|------------|---------|--------|-----------|---------|
| 1     | 16.028     | 2882    | 59941  | 11.322    | 10.217  |
| 2     | 18.575     | 22570   | 526726 | 88.678    | 89.783  |
| Total |            | 25452   | 586667 | 100.000   | 100.000 |

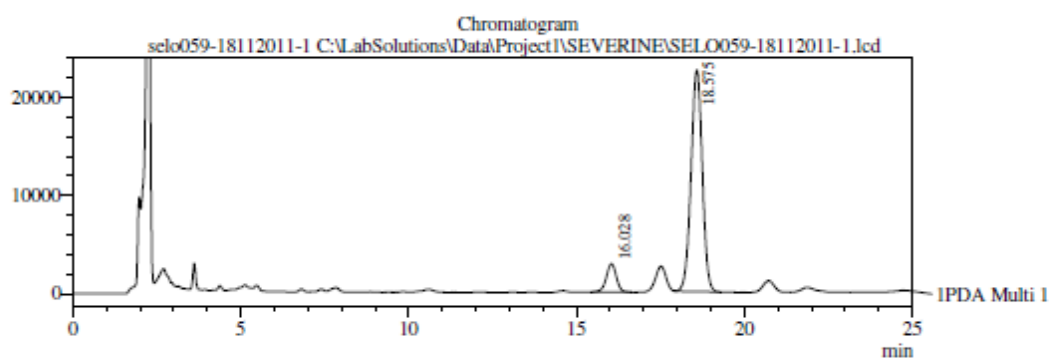

1 PDA Multi 1 / 254nm 4nm

Contour

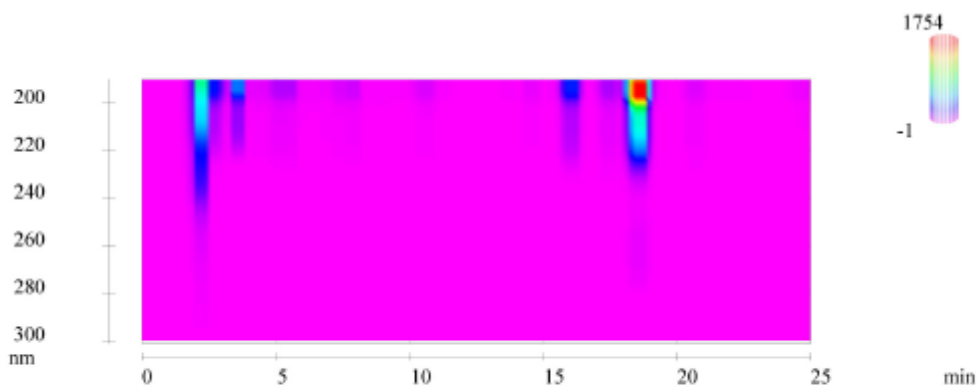

| <<LC Program>> |            | Method  |       |         |
|----------------|------------|---------|-------|---------|
| Time           | Unit       | Command | Value | Comment |
| 0.01           | Pumps      | C.Conc  | 63    |         |
| 0.01           | Pumps      | T.Flow  | 1     |         |
| 25.00          | Controller | Stop    |       |         |

C:\LabSolutions\Data\Project1\SEVERINE\SELO059-18112011-1.lcd
